# Supplementary material
Source: PubMed Central journal article supplement (PMC5465904)
Supplement: pnas.1615660114.sapp.pdf [file pnas.1615660114.sapp.pdf]

# Fundamental Trade-offs between Information Flow in Single Cells and Cellular Populations

## Supporting Information

Ryan Suderman<sup>1,\*</sup>, John A. Bachman<sup>2,\*</sup>, Adam Smith<sup>1</sup>, Peter K. Sorger<sup>2</sup> and Eric J. Deeds<sup>1,3</sup>

<sup>1</sup>Center for Computational Biology, The University of Kansas, 2030 Becker Dr., Lawrence, KS 66047

<sup>2</sup>Department of Systems Biology, Harvard Medical School, 200 Longwood Ave., Boston, MA 02115

<sup>3</sup>Department of Molecular Biosciences, The University of Kansas, 1200 Sunnyside Ave., Lawrence, KS 66047

\*These authors contributed equally to this work

Email: Eric J. Deeds - deeds@ku.edu;

## Contents

|          |                                                                                 |           |
|----------|---------------------------------------------------------------------------------|-----------|
| <b>1</b> | <b>Information Theory Calculations</b>                                          | <b>4</b>  |
| 1.1      | Mutual Information . . . . .                                                    | 4         |
| 1.1.1    | Calculating the mutual information . . . . .                                    | 4         |
| 1.1.2    | Removing bias due to finite sample size . . . . .                               | 5         |
| 1.1.3    | Finding the optimal number of bins . . . . .                                    | 6         |
| 1.2      | Channel Capacity . . . . .                                                      | 9         |
| 1.2.1    | Unimodal signal distributions . . . . .                                         | 10        |
| 1.2.2    | Bimodal signal distributions . . . . .                                          | 10        |
| 1.2.3    | Weighting the data . . . . .                                                    | 11        |
| <b>2</b> | <b>Additional Experimental Calculations</b>                                     | <b>12</b> |
| 2.1      | Control calculations . . . . .                                                  | 12        |
| 2.2      | Population size dependence of single-cell channel capacity estimation . . . . . | 12        |
| 2.3      | Dose-dependent scaling . . . . .                                                | 12        |
| 2.4      | Resampling experimental data . . . . .                                          | 13        |
| <b>3</b> | <b>Spatial Channel Capacity Estimation</b>                                      | <b>13</b> |
| 3.1      | Neutrophil motion . . . . .                                                     | 14        |

|          |                                                                                           |           |
|----------|-------------------------------------------------------------------------------------------|-----------|
| 3.2      | <i>Dictyostelium</i> motion                                                               | 14        |
| <b>4</b> | <b>Simple Model</b>                                                                       | <b>15</b> |
| 4.1      | Choosing signal values                                                                    | 17        |
| 4.2      | Varying $n$                                                                               | 17        |
| 4.3      | Estimated channel capacity saturation with population size                                | 17        |
| 4.4      | Maximal fractional response                                                               | 18        |
| 4.5      | Population $\hat{C}$ dependence on signal spacing and noise                               | 19        |
| <b>5</b> | <b>Analytical results for Gaussian responses to signal</b>                                | <b>22</b> |
| 5.1      | Model definition                                                                          | 23        |
| 5.1.1    | Calculating entropies and channel capacities                                              | 24        |
| <b>6</b> | <b>Analytical model: Uniform signal and response distributions (single cell)</b>          | <b>26</b> |
| 6.1      | Definitions                                                                               | 27        |
| 6.2      | Calculating $C(S; R)$ when $a < 1/2$                                                      | 28        |
| 6.2.1    | Calculating $p(r)$                                                                        | 29        |
| 6.2.2    | Region 1                                                                                  | 29        |
| 6.2.3    | Region 2                                                                                  | 30        |
| 6.2.4    | Region 3                                                                                  | 31        |
| 6.2.5    | Probability density of the response                                                       | 31        |
| 6.2.6    | Calculating $h(R)$ and $C(S; R)$                                                          | 32        |
| 6.3      | Calculating $C(S; R)$ when $a \geq \frac{1}{2}$                                           | 33        |
| 6.3.1    | Calculating $p(r)$                                                                        | 33        |
| 6.3.2    | Regions 1 & 3                                                                             | 33        |
| 6.3.3    | Region 2                                                                                  | 34        |
| 6.3.4    | Probability density of the response                                                       | 35        |
| 6.3.5    | Calculating $h(R)$ and $C(S; R)$                                                          | 35        |
| 6.4      | Analysis of $C(S; R)$                                                                     | 36        |
| <b>7</b> | <b>Analytical model: Uniform signal and response distributions (cellular populations)</b> | <b>38</b> |
| 7.1      | Definitions                                                                               | 38        |

|          |                                                           |           |
|----------|-----------------------------------------------------------|-----------|
| 7.2      | Characterizing signal space . . . . .                     | 39        |
| 7.2.1    | Case 1 . . . . .                                          | 39        |
| 7.2.2    | Case 2 . . . . .                                          | 41        |
| 7.3      | Population response to signal . . . . .                   | 41        |
| 7.3.1    | Average population response for Case 1 . . . . .          | 41        |
| 7.3.2    | Case 2 . . . . .                                          | 42        |
| 7.4      | Finding the optimal signal distributions . . . . .        | 42        |
| 7.4.1    | Case 1 . . . . .                                          | 42        |
| 7.4.2    | Case 2 . . . . .                                          | 43        |
| 7.5      | Calculating population-level channel capacities . . . . . | 43        |
| 7.5.1    | Case 1 . . . . .                                          | 44        |
| 7.5.2    | Case 2 . . . . .                                          | 46        |
| <b>8</b> | <b>Experimental Methods</b>                               | <b>46</b> |
|          | <b>References</b>                                         | <b>49</b> |

# 1 Information Theory Calculations

## 1.1 Mutual Information

The mutual information between two random variables representing a signal,  $S$ , and a response,  $R$ , is defined as:

$$I(S; R) = \int_S \int_R p(s, r) \log \frac{p(s, r)}{p(s)p(r)} ds dr,$$

where  $S$  is a random variable representing the input signal,  $R$  a random variable representing the response,  $p(s, r)$  is the joint probability distribution for some combination of  $s$  and  $r$  values, and  $p(s)$  and  $p(r)$  are the corresponding marginal distributions (1). One of the major difficulties in calculating this quantity from experimental data is the fact that the continuous probability density functions defined above must be estimated on the basis of an inherently discrete data set. As a result, a number of approaches have been developed to obtain unbiased estimates of the mutual information with varying degrees of accuracy (2).

In order to facilitate comparison with earlier results, we employed the same strategy used by Cheong *et al.* (3). This strategy has two main components. First, one defines a set number of “bins” in both the signal values  $s$  and response values  $r$ . In cases where one is measuring the molecular response of individual cells to a given signal (e.g. nuclear localization of NF- $\kappa$ B upon treatment with TNF- $\alpha$ , (3)), there are a small number of ligand concentrations used to treat the cells, resulting in a natural discretization of the  $S$  variable and a total of  $S_B$  bins of signal values. One defines a number of bins for the response ( $R_B$ ), and uses these bins to estimate the probability of observing some response bin given some signal bin (*i.e.*  $p(r|s)$ ). A linear extrapolation procedure is then used to estimate the mutual information one would obtain if there were an infinite amount of data in the data set. This extrapolation procedure is described in greater detail in section 1.1.2 below.

One issue with this approach, however, is that the number of bins into which the signal and response values should be divided is not well-defined; using a larger number of bins generally increases the estimated amount of information (3). To combat the potential for overestimation of the mutual information, the second phase of the procedure involves varying the total number of bins in the response variable (and, when appropriate, in the signal value as well) and estimating  $I$  for both the experimental data and a set of randomized replicates of the data. This allows one to choose a bin size that maximizes  $I$  for the real data while still estimating 0 information for the randomized versions. This element of the procedure is detailed in section 1.1.3. Estimates of the mutual information based on this approach can subsequently be used to calculate the channel capacity by finding the input distribution that maximizes  $I$  (1) (section 1.2).

### 1.1.1 Calculating the mutual information

To calculate the mutual information from our finite data sets, we first created a “contingency table”  $K$  based on the data: the rows of this matrix represent the various signal bins, and the columns are the various response bins. Each entry in the matrix is the number of observations from the data that correspond to that particular signal-response pair. The contingency table for a particular experiment might look something like this:

$$K = \begin{matrix} & r_1 & r_2 & r_3 & r_4 & r_5 \\ \begin{matrix} s_1 \\ s_2 \\ s_3 \\ s_4 \end{matrix} & \begin{pmatrix} 6 & 1 & 0 & 0 & 0 \\ 0 & 3 & 4 & 0 & 0 \\ 0 & 1 & 2 & 4 & 0 \\ 0 & 0 & 0 & 2 & 5 \end{pmatrix} \end{matrix}$$

Note that the above table is meant only as an example, and does not contain actual data. One can use the contingency table to calculate the mutual information in terms of the marginal and conditional entropies:

$$I(S; R) = H(S) - H(S|R)$$

$$I(S; R) = - \sum_i^{S_B} p(s_i) \log p(s_i) - \sum_i^{S_B} \sum_j^{R_B} p(s_i, r_j) \log \frac{p(r_j)}{p(s_i, r_j)}$$

where  $i$  ranges over the signal bins and  $j$  over the response bins in the contingency table (recall that  $S_B$  and  $R_B$  are the total number of signal and response bins, respectively). Since each entry in the contingency table can be naturally considered a conditional probability, it is helpful to rewrite this equation as:

$$I(S; R) = - \sum_i^{S_B} p(s_i) \log p(s_i) + \sum_j^{R_B} p(r_j) \sum_i^{S_B} p(r_j|s_i) \log p(r_j|s_i).$$

We can then calculate the frequencies from the contingency table entries and substitute these values into the equation. We define  $N_T$  as the sum over all entries in the table. Since each entry of the matrix,  $k_{ij}$ , is the number of instances of signal  $i$  that resulted in response  $j$ , we can define the total number of observations corresponding to a given signal bin  $i$  as  $k_{s,i} \equiv \sum_j^{R_B} k_{ij}$ . Similarly, we can define the total number of times any particular response bin  $j$  was observed as  $k_{r,j} \equiv \sum_i^{S_B} k_{ij}$ . Given these definitions, we can calculate the mutual information using the following equation:

$$I(S; R) = - \sum_i^{S_B} \frac{k_{s,i}}{N_T} \log \frac{k_{s,i}}{N_T} + \sum_j^{R_B} \frac{k_{r,j}}{N_T} \sum_i^{S_B} \frac{k_{ij}}{N_T} \log \frac{k_{ij}}{N_T}. \quad (1)$$

Equation 1 is used whenever a particular value of  $I$  is calculated in the estimation procedure described below (2; 3).

### 1.1.2 Removing bias due to finite sample size

Although it is straightforward to use equation 1 to calculate the mutual information, the fact that there are a finite number of data points in the contingency table ( $N_T$ ) can introduce biases into the calculation. To estimate this bias, one can create a smaller data set with  $N'_T$  points ( $N'_T < N_T$ ) and calculate  $I$ . As has been observed previously (3), as  $N'_T$  decreases, bootstrap replicates of the data generate higher values of  $I$ . This results in a roughly linear decrease in  $I$  as the inverse sample size decreases (Figure S1).

To correct for this bias, we used the linear extrapolation procedure employed in Cheong *et al.* and

other previous studies (3; 4). We chose a total of 5 sample sizes starting from 60% of the original data with uniform increments in inverse sample space until reaching the size of the original data set. Our procedure then involves calculating the joint frequency distribution for the original data set and then randomly sampling the specified number of values over 20 independent replicates from the joint frequency distribution. Note that we re-sample the data *with replacement*, which allows us to generate these 20 replicates across the entire range of  $N_T$  values. Sampling with replacement also allows us to find the signal distribution that maximizes  $I(S; R)$  as described in section 1.2 below. We used these randomly sampled data sets to generate new contingency tables, and using equation 1 we calculated the distribution of  $I$  across the 20 replicates. We then performed a linear regression of the  $I$  vs.  $1/N_T$  relationship (*e.g.* the straight lines in Figure S1). The y-intercept of these lines represents the extrapolation to an infinite data set (*i.e.*  $N_T \rightarrow \infty$  implies  $1/N_T \rightarrow 0$ ). All the channel capacities calculated in this work (*e.g.* those reported in Table 1 of the main text) were obtained from these y-intercepts. The errors reported for these values in Table 1, and the error bars in all figures, represent 95% confidence intervals on the linear model’s intercept estimate. We calculated these intervals using two methods: the robust variance (or *sandwich*) estimator (results are reported in Table 1 in the main text) and a bootstrapping approach. This approach involves resampling the data set  $N$  times and calculating  $\hat{C}_{S,P}$  for each data set to estimate the confidence interval. Results can be seen in Table S1.

| Signal               | Response                     | $\left(\hat{C}_{S,P} + \delta_{0.025}, \hat{C}_{S,P} + \delta_{0.975}\right)$ (bits) |
|----------------------|------------------------------|--------------------------------------------------------------------------------------|
| 6. TRAIL             | Casp-8 activity              | (1.01 – 0.02, 1.01 + 0.02)                                                           |
| 7. TRAIL             | Casp-8 activity (live cells) | (1.01 – 0.01, 1.01 + 0.02)                                                           |
| 8. TRAIL             | Casp-3 activity              | (0.56 – 0.02, 0.56 + 0.02)                                                           |
| 9. Casp-8 activity   | Casp-3 activity              | (1.23 – 0.02, 1.23 + 0.02)                                                           |
| 11. $\alpha$ -factor | <i>pFUS1</i> -GFP            | (2.26 – 0.08, 2.26 + 0.09)                                                           |
| 13. Bacterium        | neutrophil motion            | (1.82 – 0.12, 1.82 + 0.12)                                                           |
| 14. cAMP             | <i>Dictyostelium</i> motion  | (2.19 – 0.13, 2.19 + 0.14)                                                           |
| 15. TRAIL            | % dead (HeLa; resampled)     | (2.44 – 0.02, 2.44 + 0.02)                                                           |
| 16. TRAIL            | % dead (HeLa; FACS)          | (3.41 – 0.03, 3.41 + 0.02)                                                           |
| 17. TRAIL            | % dead (MCF10A)              | (3.35 – 0.04, 3.35 + 0.03)                                                           |

Table S1: Select estimates from Table 1 in the main text, but with confidence intervals calculated from bootstrapped data sets ( $N \geq 100$ , where  $N$  is the number of bootstrap samples).  $\delta_p$  is the difference between the value at the  $p^{\text{th}}$  percentile and the mean of the bootstrap distribution.

### 1.1.3 Finding the optimal number of bins

Generating the contingency table relies on a particular discretization or binning of the data. As mentioned above, the signal values used to generate experimental data often represent a natural set of signal bins (*e.g.* Figure 1C and D of the main text). The number of response bins to generate, however, is not clear *a priori*, and the value of  $R_B$  has a large impact on estimates of  $I$ . On one extreme, if we set  $R_B = 1$ , all of the signals will give the same responses, resulting in a mutual information of 0. Alternatively, we could choose a number of bins,  $R_B$ , so large that every

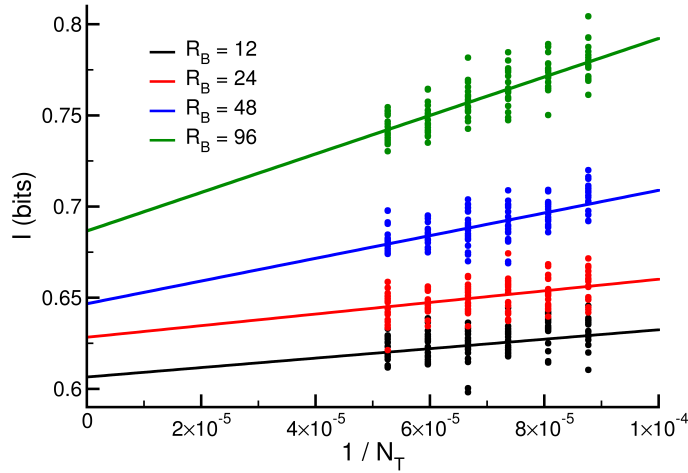

Figure S1: Representative linear models for estimating mutual information at infinite sample size with various numbers of response bins. Here we use experimental data composed of 1000 cells per each of 19 TRAIL concentrations. In this figure we are estimating the mutual information between the level of caspase-8 activity in HeLa cells in response to a uniformly distributed set of TRAIL concentrations. We then calculate the mean mutual information as a function of inverse sample size ( $\frac{1}{N_T}$ ) by taking  $n = 20$  independent subsets of the data per sample size. Shown here are the calculated mutual information values for each sampled data set. Calculation of the linear model’s intercept provides us with an estimate of mutual information at infinite sample size for a particular number of response bins.

response bin contains exactly one response value in the contingency table:

$$K' = \begin{matrix} & r_1 & r_2 & r_3 & r_4 & r_5 & r_6 & r_7 & r_8 & r_9 & r_{10} & r_{11} & r_{12} \\ \begin{matrix} s_1 \\ s_2 \\ s_3 \\ s_4 \end{matrix} & \begin{pmatrix} 1 & 1 & 0 & 1 & 0 & 0 & 0 & 0 & 0 & 0 & 0 & 0 & 0 \\ 0 & 0 & 1 & 0 & 1 & 1 & 0 & 0 & 0 & 0 & 0 & 0 & 0 \\ 0 & 0 & 0 & 0 & 0 & 0 & 1 & 0 & 1 & 1 & 1 & 0 & 0 \\ 0 & 0 & 0 & 0 & 0 & 0 & 0 & 1 & 0 & 0 & 1 & 1 & 1 \end{pmatrix} \end{matrix}$$

(where again we have used an arbitrary data set as an example). This results in a (spuriously) high mutual information—note that, in this case, if we randomly shuffle the signal value that gives any particular output, we will get the same mutual information:

$$K'_{rand} = \begin{matrix} & r_1 & r_2 & r_3 & r_4 & r_5 & r_6 & r_7 & r_8 & r_9 & r_{10} & r_{11} & r_{12} \\ \begin{matrix} s_1 \\ s_2 \\ s_3 \\ s_4 \end{matrix} & \begin{pmatrix} 0 & 0 & 0 & 0 & 0 & 1 & 0 & 0 & 1 & 0 & 0 & 0 & 1 \\ 1 & 1 & 0 & 0 & 1 & 0 & 0 & 0 & 0 & 0 & 0 & 0 & 0 \\ 0 & 0 & 1 & 0 & 0 & 0 & 1 & 0 & 0 & 0 & 1 & 0 & 0 \\ 0 & 0 & 0 & 1 & 0 & 0 & 0 & 1 & 0 & 1 & 0 & 0 & 0 \end{pmatrix} \end{matrix}$$

Since  $I$  generally increases with an increasing  $R_B$  (note the increasing intercept for the data in Figure S1), we must find an optimal value of  $R_B$  that accurately represents the mutual information in the underlying data without artificially inflating it.

Our approach to solving this problem is broadly inspired by previous approaches, particularly that of Cheong *et al.*, with some slight modifications (3; 5). Each calculation of the mutual information requires some specified number of bins, so we defined both an initial number of bins to use as well as the number of bins by which to increment. For any given  $R_B$  value, we generated the bins themselves (*i.e.* the actual range of response values in the data that belongs to each bin) so that the total number of observations  $k_{r,j}$  for each response bin is (roughly) equal across all the response bins under the signal distribution given by the data set (3; 5). We then generated the contingency table and estimated  $I$  using the linear extrapolation procedure explained above in section 1.1.2.

Plotting  $I$  *vs.* the total number of response bins (Figure S2) does indeed demonstrate that mutual information increases essentially monotonically with increasing  $R_B$ . For each value of  $R_B$ , we also generated  $N_R$  contingency tables with some specified sample size with randomly sampled entries. We calculated  $I$  for each one of them; the value of  $I$  in these randomized data sets also increases with increasing  $R_B$ , eventually generating significantly non-zero mutual information where there should be none (Figure S2).

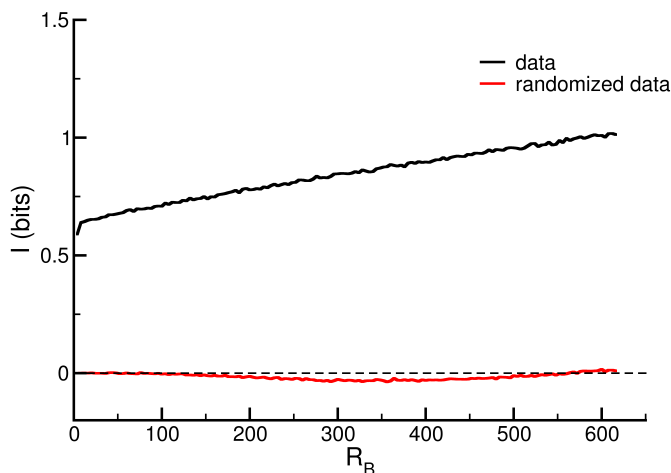

Figure S2: Here we show a representative graph of mutual information ( $I$ ) as a function of the number of response bins. The data is the same from which Figure S1 is generated and each point shown here is the  $y$ -intercept retrieved from the linear extrapolation procedure outlined in section 1.1.2. In red is one randomization of the actual data set, shown in black.

Cheong *et al.* obtained an optimal range of bin numbers for each data set via visual inspection of plots like those in Figure S2 (3). While this is an effective approach, the large number of data sets and variants in our case prevented us from visually analyzing every case. We thus defined a



uniform criterion for choosing the optimal number of bins, defined as the value of  $R_B$  that gives the largest value of  $I$ , subject to the constraint that the 95% confidence interval from the corresponding randomized data *must include* 0. In other words, we chose an  $R_B$  that maximizes the  $I$  in the data, but where the randomized data gives mutual information that is not significantly greater than 0.

The range of  $R_B$  values that provides this maximum depends on the total number of data points ( $N_T$ ) and on the amount of information present in the data itself; it is thus difficult to define a uniform range of bin numbers to consider for every data set. Therefore we implemented a method to automate the search for the optimal number of bins. In essence, this method iteratively increments the number of bins used in the calculation until a prespecified number of randomized calculations (in our case, 3) for consecutive increments were biased (*i.e.* significantly above zero).

The discussion above assumes that  $S_B$  is fixed at some particular number of signal values, as is typical when generating experimental data. In some of the systems we considered, however, we needed to find an optimal set of signal bins in addition to response bins. This was particularly true of spatial quantities like the angle between the bacterium and the neutrophil (see section 3). In those cases, we adapted this method to identify the optimal number of bins in both signal and response space.

## 1.2 Channel Capacity

As mentioned in the main text, the channel capacity is the supremum of the mutual information over all possible signal distributions:

$$C = \sup_{p_S(s)} I(S; R).$$

Estimating the channel capacity thus involves using the estimate of mutual information obtained from the procedure defined in section 1.1 to search the space of signal distributions and find the one that maximizes  $I$ . Since the set of such distributions is obviously infinite, an exhaustive search of all well-defined signal distributions is impossible. Following the example of Cheong *et al.* (3), we implemented a grid-based search, limited to a set of unimodal and bimodal Gaussian distributions in addition to a uniform distribution of signal values and the distribution present in the original data set (if it is not already uniform). Additionally our estimate is limited by the finite set of signal values over which the data itself is collected. We thus define a new quantity as the *estimated* channel capacity given the set of sampled signal values  $S$  and the set of probability mass functions  $P$  attempted in our optimization:

$$\hat{C}_{S,P} \leq C$$

giving us a lower bound on the true channel capacity.

### 1.2.1 Unimodal signal distributions

We generated a range of unimodal signal distributions of the form:

$$G_U(s) = \frac{1}{\sigma\sqrt{2\pi}} e^{-\frac{(s-\mu)^2}{2\sigma^2}}.$$

Since we can sample only a subset of possible signal distributions we limit the potential mean values,  $\mu$ , to a set of 4 evenly spaced values between the minimum and maximum signal values in the data set ( $S_{min}$  and  $S_{max}$ , respectively):

$$\mu \in \{f \cdot (S_{max} - S_{min}) + S_{min} \mid f \in \{0.2, 0.4, 0.6, 0.8\}\}.$$

For each  $\mu$  we generate a range of  $\sigma$  values by calculating a maximum standard deviation:

$$\sigma_{max} = \min\left(\frac{\mu - S_{min}}{3}, \frac{S_{max} - \mu}{3}\right).$$

This constrains the signal distributions so that at least 99% of the area under the distribution falls between  $S_{min}$  and  $S_{max}$  and allows us to use a range of standard deviation values by sampling increasing fractions of  $\sigma_{max}$ :

$$\sigma \in \{f \cdot \sigma_{max} \mid f \in \{0.2, 0.4, 0.6, 0.8, 1\}\}.$$

### 1.2.2 Bimodal signal distributions

We also implemented a range of bimodal signal distributions of the form:

$$G_B(s) = \frac{w_0}{\sigma_0\sqrt{2\pi}} e^{-\frac{(s-\mu_0)^2}{2\sigma_0^2}} + \frac{w_1}{\sigma_1\sqrt{2\pi}} e^{-\frac{(s-\mu_1)^2}{2\sigma_1^2}}$$

where  $w_0$  and  $w_1$  are weighting coefficients such that  $w_0 \in \{0.4, 0.5, 0.6\}$  and  $w_1 = 1 - w_0$ . In order to construct these distributions we first defined a minimum difference between  $\mu_0$  and  $\mu_1$ :

$$\mu_D = \frac{S_{max} - S_{min}}{5}.$$

We used  $\mu_D$  to construct a series of pairs  $(\mu_0, \mu_1)$  such that

$$\mu_D + S_{min} \leq \mu_0 < S_{max}$$

$$\mu_0 + \mu_D \leq \mu_1 < S_{max}$$

and  $\mu_0$  is incremented in steps of  $\mu_D$ . Similarly to the unimodal signal distributions, both means  $\mu_0$  and  $\mu_1$  have multiple, evenly spaced standard deviations,  $\sigma_0$  and  $\sigma_1$  that are fractions of some maximum standard deviations,  $\sigma_{0,max}$  and  $\sigma_{1,max}$ . These values are constrained so that these distributions have both a local minimum between  $\mu_0$  and  $\mu_1$  and 99% of their area between  $S_{min}$

and  $S_{max}$ :

$$\sigma_{0,max} = \min\left(\frac{\mu_1 - \mu_0}{4}, \frac{\mu_0 - S_{min}}{3}\right)$$

$$\sigma_{1,max} = \min\left(\frac{\mu_1 - \mu_0}{4}, \frac{S_{max} - \mu_1}{3}\right).$$

The individual  $\sigma_0$  and  $\sigma_1$  values are then:

$$\sigma_0 = f \cdot \sigma_{0,max}$$

$$\sigma_1 = f \cdot \sigma_{1,max},$$

where  $f \in \{0.2, 0.4, 0.6, 0.8, 1\}$ .

### 1.2.3 Weighting the data

With this set of unimodal and bimodal signal distributions, we can determine how the mutual information of a particular data set varies with different signal distributions in order to estimate the channel capacity. To do this, we modified the original contingency table in order to recalculate the mutual information according to each new signal distribution. Each signal bin  $s_i$  corresponds to a range of signal values between, say,  $s_{i,min}$  and  $s_{i,max}$  and yields a corresponding number of observations in the contingency table,  $k_{ij}$  for each response bin  $r_j$ . For any unimodal or bimodal signal distribution  $G_A(s)$ , we calculated the new value for this entry in the contingency table

$k'_{ij} = \frac{p'(s_i)k_{ij}}{p(s_i)}$  where

$$p'(s_i) = \int_{s_{i,min}}^{s_{i,max}} G_A(s) ds$$

is the new probability of observing some signal value  $s_i$  and  $p(s_i)$  is the uniform probability of observing that signal bin  $s_i$ . We can use this to generate a new contingency table, and calculate the relevant quantities:

$$N'_T = \sum_i^{S_B} \sum_j^{R_B} k'_{ij}, \quad k'_{s,i} = \sum_j^{R_B} k'_{ij}, \quad k'_{r,j} = \sum_i^{S_B} k'_{ij}.$$

The procedure produces a new contingency table that has the same number of entries as the original one. For each distribution  $G_A(s)$  that we considered, we used the procedures described in section 1.1 to estimate the mutual information for that particular distribution. The maximum mutual information over all signal distributions calculated is our estimate of the channel capacity  $\hat{C}_{S,P}$  which we will refer to as simply  $\hat{C}$  for notational convenience. As mentioned above, the errors reported for  $\hat{C}$  represent the 95% confidence interval for the intercept estimated by the linear extrapolation procedure (section 1.1.2).

## 2 Additional Experimental Calculations

### 2.1 Control calculations

As mentioned in the main text, we examined the channel capacities between the activities of the initiator caspase (IC; cleaved caspase 3) and both the effector caspase (EC; cleaved PARP) and terminal cellular phenotype. We found that the IC to EC channel capacity exceeded 1.2 bits. This confirms the nature of IC as an intermediate component in the TRAIL signaling network due to the relative increase in information when using IC as the input distribution to the channel capacity estimation instead of TRAIL.

### 2.2 Population size dependence of single-cell channel capacity estimation

Given our large data set, we investigated how  $\hat{C}$  would vary for individual cells as a function of population size; as mentioned in the main text, the population-level  $\hat{C}$  has a clear dependence on the size of the population. We expected to find that as the sample size increases the estimators describing the response distribution will be sufficiently accurate to prevent the need to calculate  $\hat{C}$  from the entire data set of over 1.2 million cells (which is computationally expensive). We confirmed this empirically, upon estimation of the single-cell  $\hat{C}$  for increasing subsets of our FACS-generated data, using sample sizes of 500, 1000, and 2000 cells per TRAIL concentration.

### 2.3 Dose-dependent scaling

In our data we observed that IC activity levels were substantially higher in dead than live cells, most likely due to the variety of positive feedback mechanisms present in the caspase cascade (6). Because this additional cleavage of caspase 3 in dead cells occurs downstream of the cell's commitment to apoptosis, it could be considered a consequence of the cell's phenotypic outcome rather than as an intermediate factor contributing to it. Since the channel capacity estimation is time-dependent (and capturing the exact moment of cell death for every cell is technologically infeasible), we proceeded to examine the impact that post-commitment IC activity has on our estimates for channel capacity between TRAIL dose and IC activity level. We therefore performed our analysis separately for live and dead cells by partitioning them into these two groups according to the threshold effector caspase response,  $t_{EC}$  (7); we calculated this quantity by estimating the minimum density between the two peaks of the bimodal EC activity distribution:  $\log_{10}(t_{EC}) = 2.85 \pm 0.05$  (8). We then plotted the dose response data to determine how response varies with TRAIL concentration. These plots show clearly that only initiator caspase activity scales with TRAIL dose, and it does so only among living cells (Figure S3). The value of  $\hat{C}$  between TRAIL and IC activity in living cells is approximately 1.01 bits as shown in Table 1 in the main text, essentially the same as the estimated channel capacity between TRAIL and IC activity in all cells. Mean effector caspase activity in living and dead cells in addition to mean initiator caspase activity in dead cells does not significantly vary for differing doses of TRAIL (Figures S3 and S4) and as a result, we did not estimate the channel capacity for these dose-response relationships.

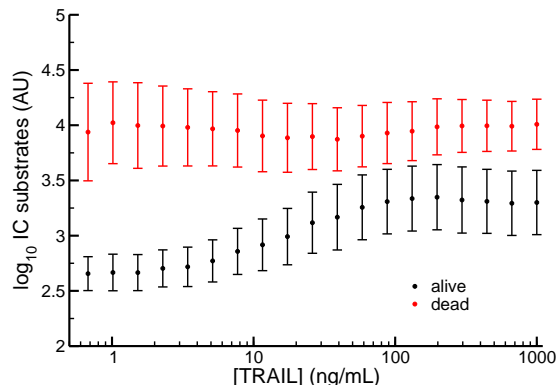

Figure S3: Initiator caspase activity scales with TRAIL among living cells. Shown for each TRAIL concentration are the sample mean and standard deviation ( $n \approx 60,000$  cells)

## 2.4 Resampling experimental data

In order to estimate the channel capacity for the pheromone signaling network in yeast, we reconstructed dose-response data shown by Bashor *et al.* in their Figure 4D (9). In this case the signal distribution was a set of logarithmically spaced  $\alpha$ -factor concentrations and the corresponding response was  $pFUS1$ -GFP fluorescence. With this data we constructed a series of dose-dependent Gaussian distributions defined by the mean and standard deviation of the  $pFUS1$ -GFP response given some  $\alpha$ -factor concentration. From these distributions we sampled 100 values for each of 10  $\alpha$ -factor concentrations in order to construct a dose-response data set from which we could estimate the channel capacity (Figure S5). We similarly performed this procedure for estimating the population-level channel capacity for the set of MCF10A and HeLa cells shown in Figure 3B of the main text. In this case, the mean and standard deviation for a particular TRAIL dose refer to the number of living cells in a given population.

## 3 Spatial Channel Capacity Estimation

In order to estimate the spatial channel capacity between a motile cell undergoing chemotaxis and its target that is producing some chemical gradient, we constructed signal/response pairs from angles between the cell and its target. We used the CellTrack program developed by Sacan *et al.* (10) to output text files containing frame-by-frame coordinates for the edges of the cells and their centers of mass (COM) as shown in Figure S6A. We used these coordinates to calculate time-dependent signal and response angles (Figure S6B).

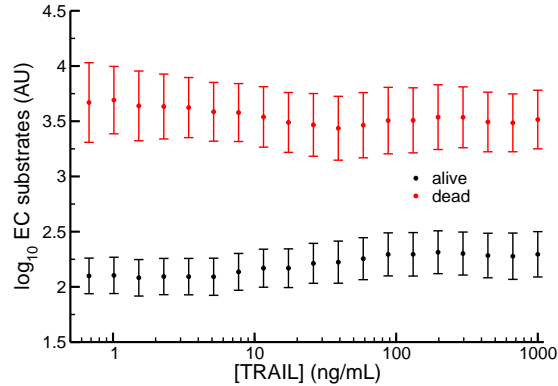

Figure S4: Effector caspase activity is invariant with TRAIL among both living and dead cells. The data set is identical to that in Figure S3.

### 3.1 Neutrophil motion

We initially analyzed the motion of a neutrophil that is “chasing” a bacterium from a classic movie taken in the 1950s ([www.youtube.com/watch?v=Kb-m1uDoWfU](http://www.youtube.com/watch?v=Kb-m1uDoWfU)). For the purposes of our calculation, we assume that the neutrophil is in fact following a chemical gradient generated by the bacterium. In this case, the signal corresponds to the angle, termed  $\theta_1$ , between the bacterium at a particular frame in the movie, time  $t$ , and the neutrophil at another time  $t + \Delta t_1$ . The subsequent response angle,  $\theta_2$ , is that of neutrophil motion between time  $t + \Delta t_1$  and time  $t + \Delta t_1 + \Delta t_2$ . These angles then comprise the signal and response distributions used to calculate  $\hat{C}$  of the system. A visual representation of this calculation can be seen in the main text (Figure S6A&B).

We calculated the signal and response angles between the neutrophil COM and bacterial COM relative to the  $x$ -axis unit vector in the Cartesian coordinate system. This method is similar to one outlined by Burov *et al.* derived to provide more directional information than mean squared displacement for analysis of random walks (11). We employ a “windowed” data collection method; given some starting time,  $t$ , we calculate an arbitrary signal and response angle pair, requiring information from time points,  $t + \Delta t_1$  and  $t + \Delta t_1 + \Delta t_2$ . In our windowed data collection, the next pair of angles is calculated using  $t$  incremented by one frame:  $t = t + 1$ . To confirm that the estimated channel capacity was not an artifact of the chosen time delay values,  $\Delta t_1$  and  $\Delta t_2$ , we explored the nearby  $(\Delta t_1, \Delta t_2)$ -space and discovered that  $\hat{C}$  is relatively robust to  $\Delta t_1$  and  $\Delta t_2$  as seen in Figure S6C.

### 3.2 Dictyostelium motion

The next movie we analyzed is that of a *Dictyostelium* cell following a cAMP gradient (Movie S1, provided courtesy of Susan Lee and Richard Firtel, Section of Cell and Developmental Biology,

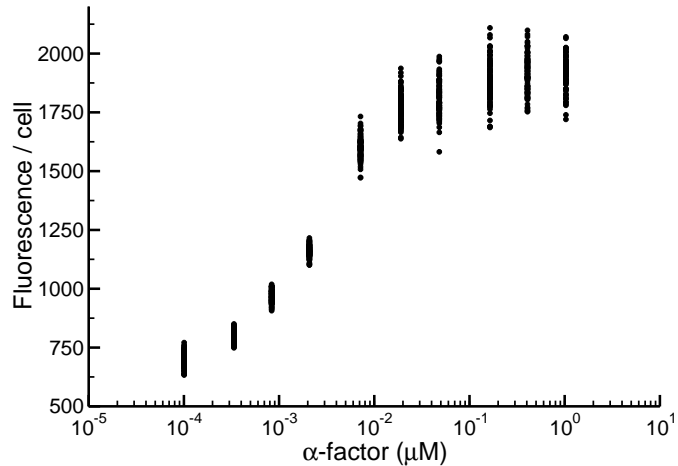

Figure S5: Resampled data from Figure 4D in Bashor *et al.* (9).

Division of Biological Sciences, University of California, San Diego, La Jolla, CA). In this movie, *Dictyostelium* responds to cAMP introduced by a pipette tip which changes location periodically. Since the pipette tip remains stationary between location shifts, we can employ our original calculation used for the neutrophil/bacterium data and omit the  $\Delta t_1$  parameter (the largest value of  $\hat{C}$  occurs when  $\Delta t_2 = 18$ ). This omission is valid since  $\theta_1$  is identical for a range of  $\theta_2$  values (*i.e.* no motion in the gradient source/change in the signal).

#### 4 Simple Model

As mentioned in the main text, our initial model takes the form:

$$R = (R_{max} - R_{min}) \cdot \frac{S^n}{S^n + K^n} + R_{min} + \epsilon \quad (2)$$

where the normally-distributed noise term  $\epsilon \sim N(0, \sigma)$  has some chosen standard deviation,  $\sigma$ . The parameter values chosen for the base model (shown in Figure 3) are as described in the Materials and Methods section of the main text:  $K = 10$ ,  $n = 6$ ,  $R_{max} = 30$ , and  $R_{min} = 20$ . For all models discussed in the paper, the response threshold governing an individual cell's fate is positioned such that half of the signal values produce mean responses below the threshold and half produce mean responses above the threshold.

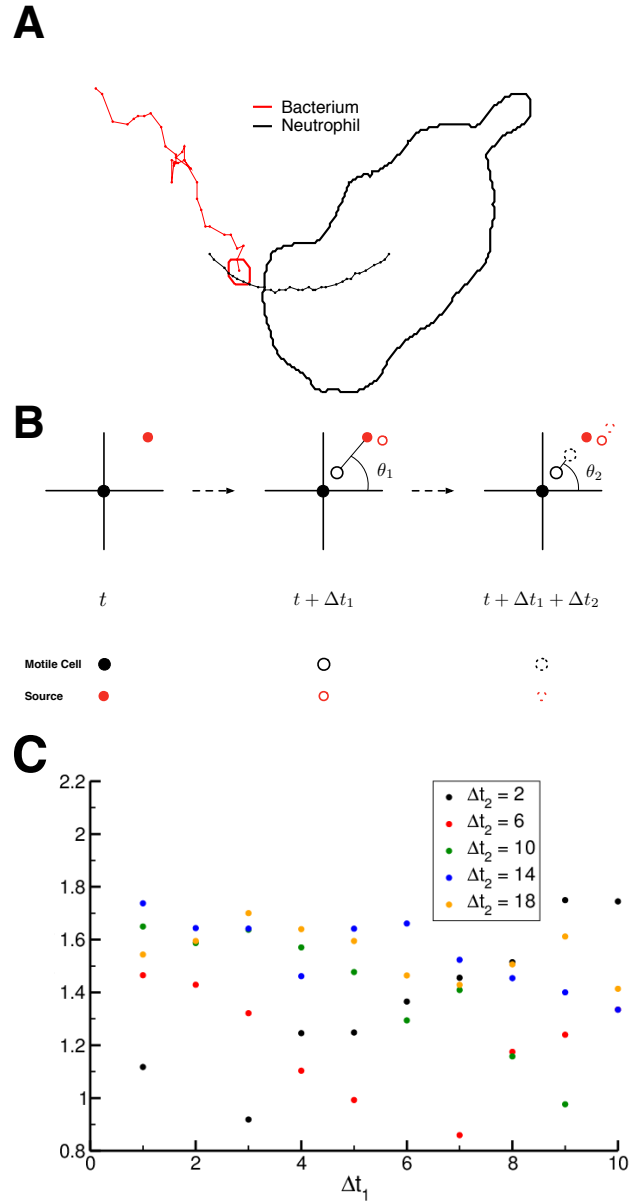

Figure S6: **A**. A representative trajectory from the neutrophil movie. Points are centers of mass for the bacterium (signal source, red) and neutrophil (motile cell, black). The bold, outlined areas show the cells' perimeters in the trajectory's first frame. Clearly seen here is the bacterium's stochastic random walk-like motion and the neutrophil's smoother tracking of the resulting gradient. **B**. Black circles represent the motile cell and red circles represent the signal source (either a micropipette or bacterium). Since cells do not instantaneously detect or respond to extracellular stimuli, filled, solid, and dashed circles represent the motile cell and signal source at initial ( $t$ ), signal-delayed ( $t + \Delta t_1$ ), and response-delayed ( $t + \Delta t_1 + \Delta t_2$ ) time, respectively. We can then calculate the mutual information between the signal ( $\theta_1$ ) and response ( $\theta_2$ ) angles. **C**. Spatial  $\hat{C}$  for the neutrophil as it depends on  $\Delta t_1$  and  $\Delta t_2$  for select values.



## 4.1 Choosing signal values

For our initial analysis of the model, we selected evenly-spaced signal values to achieve responses 10% above the minimum response and 10% below the maximum response (the *transition zone*):

$$0.1 \cdot (R_{max} - R_{min}) + R_{min} \leq R \leq 0.9 \cdot (R_{max} - R_{min}) + R_{min}$$

Through simple algebra we show that the resulting minimum and maximum signal values, ( $S_{min}$  and  $S_{max}$ , respectively) are:

$$S_{min} = K \cdot \sqrt[n]{\frac{1}{9}}$$

and

$$S_{max} = K \cdot \sqrt[n]{9}$$

This prevents selection of signal values that would produce extremely high or low responses, since sampling more of these responses relative to intermediate responses would reduce the estimated channel capacity.

## 4.2 Varying $n$

In order to determine the effect of our chosen  $n = 6$  on this model's estimated channel capacity (both single-cell and population-level), we varied  $n$  between 2 and 10. We see in general from Figures S7 and S8 that this variation produces minimal difference between models; qualitatively, models with different  $n$  are nearly identical.

## 4.3 Estimated channel capacity saturation with population size

As discussed in the main text, the fraction of a group of cells making a particular signal-dependent decision is the statistic used to determine collective response for the population-level estimation of the channel capacity. By calculating this statistic over a number of replications, we effectively construct a sampling distribution for the fractional response to some arbitrary signal. Since the standard deviation of this distribution (*i.e.* the standard error of the statistic) is dependent on sample size, we observe an inverse correlation between the size of the population and the standard error of the fractional response (Figure S9). In other words, the larger the population, the lower the fluctuations in the percentage of cells that respond to some signal, and the higher the population-level channel capacity becomes (see Figures 3B and D in the main text). In our calculations for the Gaussian model (Equation 2), the estimated channel capacity eventually saturates at some level as population size increases. We should note that this is a simple consequence of the fact that we limit our sampling in this model to a particular number  $N_S$  of signal values the increasing regime of the *single-cell* dose-response curve. As a result, when noise is high enough, the population-level channel capacity approaches its theoretical maximum, which is the entropy of a uniform distribution over the sampled signal values ( $\hat{C} \sim \log_2(N_S)$  bits). Changing how the signal values are sampled thus has a strong influence on estimates of the population-level channel capacity, an issue that is discussed in detail in sections 4.5 and 7.3 below.

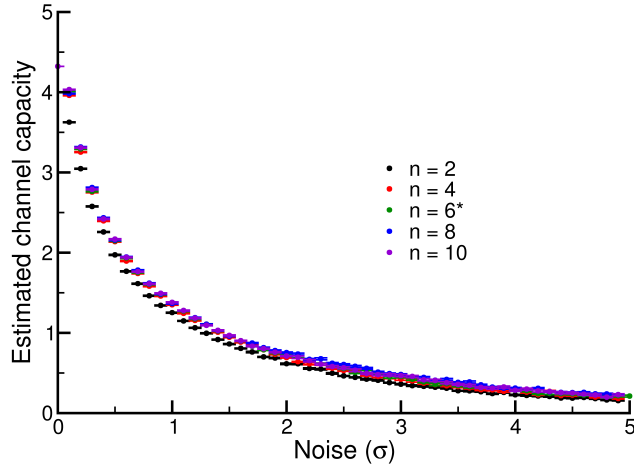

Figure S7: Single-cell estimated channel capacities ( $\hat{C}$ ) with respect to noise for a range of  $n$  values. The starred  $n = 6$  denotes the value used in all other calculations based on this model. There is minimal difference between models where  $n > 2$  and even the model with  $n = 2$  displays qualitatively similar behavior to the others. Error bars denote 95% confidence about the intercept estimate (see section 1.1.2)

#### 4.4 Maximal fractional response

At high levels of noise, we observe another important feature of the population response: the inability to effect a universal population response at arbitrarily high signal levels. In other words, no matter how much signal is present in the environment, there will still be a fraction of cells in a population that does not respond. This is plainly observed graphically in Figure S10; even as the response saturates at low and high signal levels, there is sufficient noise such that a subpopulation of cells at these signal levels fall above and below the threshold, respectively. The corresponding population dose-response curve thus exhibits saturating, incomplete responses both at low and high signal levels (Figure S11).

As mentioned above, we chose the threshold in the response (*i.e.* the value of  $R$  above which an individual cell decides to die or undergo some other cell-fate decision) so that this saturation is *symmetric*. In other words, if 25% of the cells survive at saturating levels of signal, then 25% of them will die even when there is essentially no signal at all in our model (Figure S10). Note that, in our experimental data for HeLa cells, we found that 100% of cells survive when the population is not treated with TRAIL, and around 50% of them die at saturating TRAIL levels (Figure 2A in the main text). In our model, this would correspond to moving the threshold to higher values, so that no cells respond at low signal, and only half respond at high signal. Since  $I$ , and thus  $\hat{C}$  are invariant to this kind of transformation (*i.e.* changing the absolute range of the response value), we focused on a symmetric threshold for simplicity, without loss of generality.

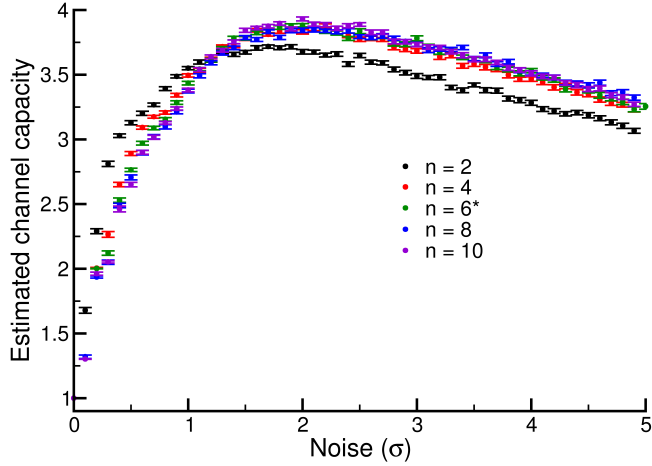

Figure S8: Population-level  $\hat{C}$  with respect to noise for a range of  $n$  values. Again we see little difference between models with different  $n$  with the minor exception of  $n = 2$ . We do observe a slight shift in the amount of noise producing maximal  $\hat{C}$ , but the qualitative trends are essentially identical. Error bars are as in Figure S7.

#### 4.5 Population $\hat{C}$ dependence on signal spacing and noise

As mentioned in the main text, we sampled a fixed number of signal values corresponding to responses between 10% and 90% of the maximal *population* response for a given noise value. Upon reaching a noise threshold, the population-level  $\hat{C}$  is effectively constant as noise approaches 0 (Figure S12), contradicting the existence of a nontrivial level of noise producing maximal population-level  $\hat{C}$  shown in the main text (Figure 3C). We also observed that by simply increasing the number of signal values sampled in the single-cell transition region decreases the amount of noise required to reach the maximal population-level  $\hat{C}$  (Figure S13). Both of these strategies for increasing (or maintaining) population-level  $\hat{C}$  require increasingly small  $\Delta S$ . Since many *in vivo* inducers of intracellular signaling are cytokines that are themselves subject to fluctuations in concentration, we posited that this variability in the signal would prevent optimal population-level  $\hat{C}$  at arbitrarily low noise.

To confirm this numerically, we introduced another noise term into the simple model (the *signal* noise,  $\epsilon_s$ , as opposed to the original *response* noise,  $\epsilon$ ) governing the limit of signal accuracy for our populations of simulated cells. This alternate form of the model (modified from Equation 2) has the following form:

$$R = (R_{max} - R_{min}) \cdot \frac{(S + \epsilon_s)^n}{(S + \epsilon_s)^n + K^n} + R_{min} + \epsilon$$

where the signal noise term  $\epsilon_s$  is normally distributed and is sampled independently for each *population* of cells:  $\epsilon_s \sim N(0, \sigma)$ . This procedure simulates stochastic cytokine production and

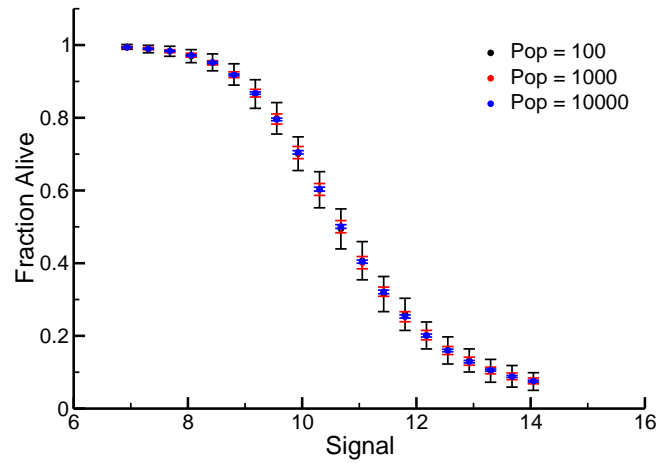

Figure S9: Population-level dose-response curves for multiple population sizes

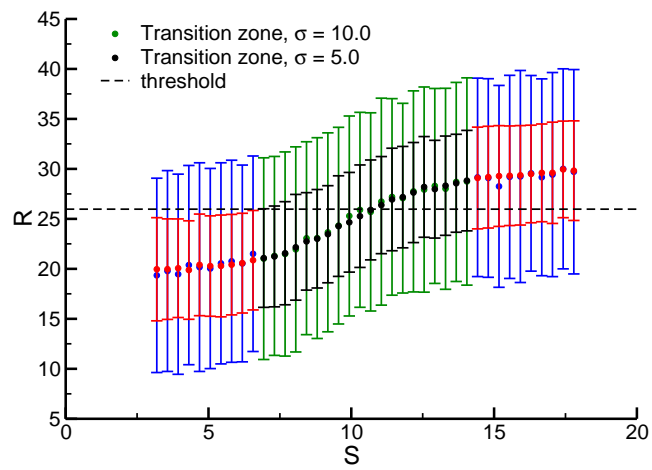

Figure S10: Single cell response curve at high noise values

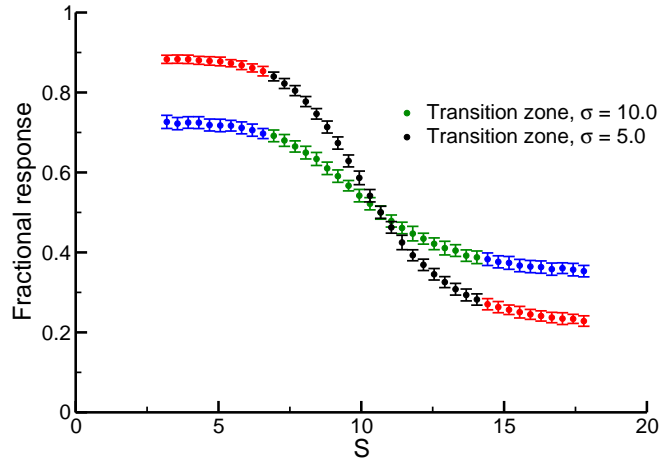

Figure S11: Population response curve at high noise values (population size = 1000)

distribution to cellular populations, and it is distinct from the application of the original noise term,  $\epsilon$ , that was applied to each individual cell. The population-level  $\hat{C}$  can be seen in Figure 3D in the main text for select values of signal noise, revealing that even in the presence of very small signal noise (1% of the signal needed to achieve a half-maximal response), there exists a nontrivial level of noise that maximizes information available to cellular populations.

The question then becomes: what is a reasonable level of signal noise? Unfortunately, *in vivo* distributions for cytokines like TRAIL have not been measured in sufficient detail for us to characterize the typical size of such fluctuations. To estimate this, we considered a prototypical signaling environment: namely, the intestinal crypt in mammals. This cylindrical structure contains about 1000 cells that line a fluid-filled interior lumen with a volume of about  $5 \times 10^{-12}$  L (12; 13). As can be seen from Figures 2A and 2B in the main text, the population-level transition in cell death occurs from about 1 to  $10^2 - 10^3$  ng/mL. This would translate to a range of  $\sim 10^2 - 10^4$  or  $10^5$  molecules of TRAIL in the lumen of the intestinal crypt.

Since cytokines like TRAIL are actively synthesized by cells, and would be lost from the lumen either due to active degradation or diffusion away from the crypt, those cytokines would, at the very least, be subject to standard Poisson-style birth-death fluctuations. The relative error in signal values (*i.e.* the coefficient of variation, or  $\sigma_s/\langle s \rangle$ ) would be  $1/\sqrt{m}$ , where  $m$  is the number of molecules (14; 15; 16; 17). In the case of the intestinal crypt described above, we would expect around  $10^4$  molecules, corresponding to a relative error of  $\sim 1\%$ .

We should note that the estimate of  $\sim 1 - 0.1\%$  signal error ignores any “extrinsic” sources of noise in the signal (15; 16; 17), and as such likely represents an underestimate of signal fluctuations in biological systems. Interestingly, we observed relatively large dynamic ranges for the population-level responses in both HeLa and MCF10A cells (over an order of magnitude of TRAIL concentrations, see Figure 2 of the main text), which may indicate that signal noise has

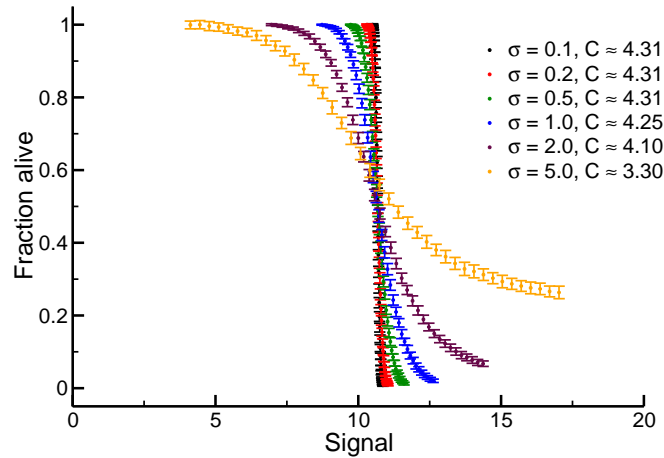

Figure S12: By sampling evenly-spaced signal values in the population dose-response transition zone (which varies with the level of noise in individual cells), we observe that the population-level  $\hat{C}$  becomes invariant to noise levels as below a certain threshold.

played a role in shaping population-level response. In any case, although very small levels of single cell noise could theoretically produce high population-level  $\hat{C}$  (Figure S12), the presence of signal variability in biologically realistic systems requires higher levels of noise, so that signal values can be spaced at reasonable distances from one another while maintaining low variability in the population-level response.

## 5 Analytical results for Gaussian responses to signal

Numerical calculations on our original signal-response model suggested a number of interesting underlying relationships between noise and single-cell/population-level channel capacity. In order to characterize those relationships more fully, we developed an analytical framework for the model. Our original version utilized a discrete set  $S$  of signal points, and as such represents a type of “Gaussian mixture model” commonly encountered in communication theory and other areas of computer science. Unfortunately, there is currently no closed-form solution for the entropy of a Gaussian mixture model (18). In order to make analytical progress on the model, we created a closely related version where  $S$  is now construed to be a *continuous*, rather than discrete, random variable. Though some parameters differ in this version (*i.e.* the minimum and maximum mean response), the core structure of the model, including the signal-response relationship and the variability of single-cell response given a particular signal value, remains the same.

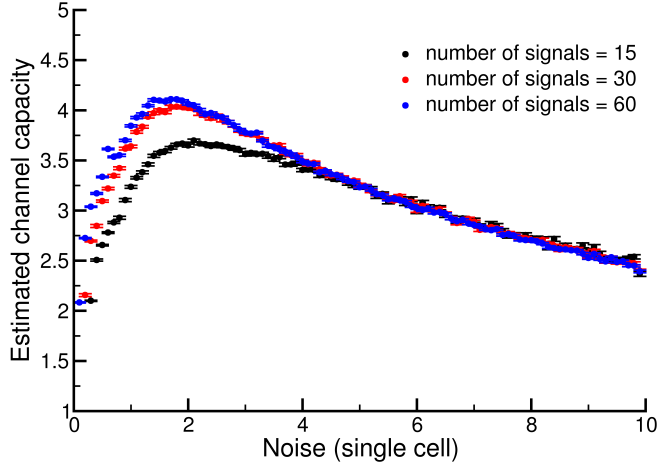

Figure S13: Increasing the number of sampled signal values in the transition zone of the *individual* cell's dose-response curve (*i.e.* independently of the population dose-response transition zone) results in a decrease in optimal noise level and an increase in estimated channel capacity.

## 5.1 Model definition

Our analytical calculations of the continuous, Gaussian signal-response model are based on the following definitions:

1.  $R$  is the response variable
2.  $S$  is the signal variable
3.  $p(R|S)$  is normally distributed:

$$p(R|S = s) = \text{N}(\mu(s), \sigma)$$

with some arbitrary  $\sigma$  and a signal-dependent  $\mu(s)$ .

4. In our original signal-response model, we had  $\mu(s) = r_{min} + (r_{max} - r_{min}) \frac{s^n}{s^n + K^n}$ , where  $K$  is the signal value giving a half-maximal response and  $r_{min}$  and  $r_{max}$  are the minimum and maximum average responses, respectively. To simplify the calculation, in this model we define  $r_{min} = 0$  and  $r_{max} = 1$  so that  $p(R|S = s) = \text{N}\left(\frac{s^n}{s^n + K^n}, \sigma\right)$ . Since the units on  $R$  are arbitrary and don't influence the calculation of  $I(S; R)$ , we can make this simplification without loss of generality.

### 5.1.1 Calculating entropies and channel capacities

Our initial goal with this model is to characterize the mutual information of this signal-response relationship. We know from the definition of mutual information that:

$$I(S; R) = h(R) - h(R|S)$$

where  $h(R)$  denotes differential entropy and is defined as:

$$h(R) = - \int_{-\infty}^{\infty} p(r) \log_2 p(r) dr,$$

and the base of the logarithm denotes the units of information. Here we use base 2, resulting in units of bits. The conditional differential entropy is then:

$$h(R|S) = - \int p(s) \int p(r|s) \log_2 p(r|s) dr ds.$$

Note that we have dropped the bounds on the integral for notational convenience; the domain  $(-\infty, \infty)$  is implied for both  $S$  and  $R$ . In order to calculate this, and related quantities, it is helpful to know the probability density of signal  $p(s)$ . To calculate  $C$ , we need to find the density that maximizes  $I(S; R)$ . Laughlin first introduced the principle of “gain adaptation” to show that  $I$  is maximized when the input (signal) distribution is the first derivative of the mean signal-response curve (as can be seen in Figure S14) (19). In other words, the optimal signal distribution is obtained when considering  $\mu(s)$  to be the Cumulative Distribution Function (CDF) of the signal. We can thus calculate the probability density of signal as:

$$p(s) = \frac{d}{ds} \left( \frac{s^n}{s^n + K^n} \right) = \frac{s^n n}{s(s^n + K^n)} - \frac{n(s^{2n})}{s(s^n + K^n)^2}$$



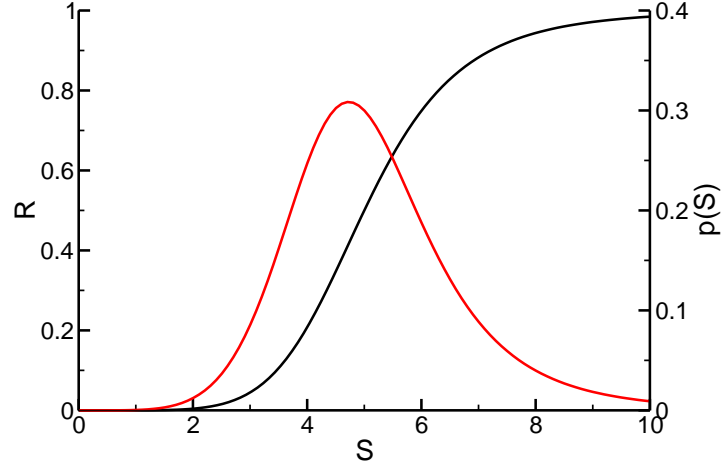

Figure S14: Calculating the optimal signal probability density for the continuous Gaussian signal-response model. In this case, we have taken  $K = 5$  and  $n = 6$  in the model, for the purposes of display. Shown in black is the mean response to signal and shown in red is the corresponding probability density that maximizes information transmission.

We have  $p(r|s)$  by definition so we can then find both  $h(R|S)$  and  $p(r)$ . We will focus first on  $h(R|S)$ :

$$\begin{aligned}
 h(R|S) &= - \int p(s) \int \frac{1}{\sigma\sqrt{2\pi}} e^{-\frac{\left(r - \frac{s^n}{s^n + K^n}\right)^2}{2\sigma^2}} \log_2 \frac{1}{\sigma\sqrt{2\pi}} e^{-\frac{\left(r - \frac{s^n}{s^n + K^n}\right)^2}{2\sigma^2}} dr ds \\
 &= \int p(s) \cdot \frac{1}{2} \log_2 (2\pi e \sigma^2) ds \\
 &= \frac{1}{2} \log_2 (2\pi e \sigma^2) \cdot \int p(s) ds \\
 &= \frac{1}{2} \log_2 (2\pi e \sigma^2)
 \end{aligned}$$

which is obviously just the entropy of the conditional Gaussian distribution. We then calculate

the marginal probability density of signal,  $p(r)$ :

$$\begin{aligned}
p(r) &= \int p(s) \cdot p(r|s) ds \\
&= \int \left( \frac{s^n n}{s(s^n + K^n)} - \frac{n(s^{2n})}{s(s^n + K^n)^2} \right) \cdot \frac{1}{\sigma\sqrt{2\pi}} e^{-\frac{\left(r - \frac{s^n}{s^n + K^n}\right)^2}{2\sigma^2}} ds \\
&= \frac{1}{2} \left( \operatorname{erf} \left[ \frac{r\sqrt{2}}{2\sigma} \right] - \operatorname{erf} \left[ \frac{(r-1)\sqrt{2}}{2\sigma} \right] \right)
\end{aligned} \tag{3}$$

where erf is the standard error function. Note that this integral was computed using Mathematica (20). This gives us the following integral for the marginal entropy of  $R$ :

$$h(R) = \int \frac{1}{2} \left( \operatorname{erf} \left[ \frac{r\sqrt{2}}{2\sigma} \right] - \operatorname{erf} \left[ \frac{(r-1)\sqrt{2}}{2\sigma} \right] \right) \log_2 \left( \frac{1}{2} \left( \operatorname{erf} \left[ \frac{r\sqrt{2}}{2\sigma} \right] - \operatorname{erf} \left[ \frac{(r-1)\sqrt{2}}{2\sigma} \right] \right) \right)$$

Since the difference of error functions enters the integral under the logarithm, we were unable to compute a closed-form expression for  $h(R)$ , and by extension  $C(S; R)$ , in this case. We consider a simplified and more analytically tractable version of this model below (Section 6). We can, however, calculate the marginal entropy of  $R$  in this model by using numerical integration. Using standard integration packages in Python (21), we calculated  $h(R)$  and  $C(S; R)$  and found that the single-cell channel capacity in this model does indeed approach 0 as noise increases (Figure S15).

To better understand this finding, we can plot the two error functions whose difference makes up  $p(r)$  (see Figure S15A). Note that, when  $\sigma$  is small, the error functions are essentially two step functions, one that occurs at 0 and the other that occurs at 1 (Figure S15A, red curve). The marginal probability density of  $R$ , which is just the difference between these two functions (Equation 3), is thus essentially uniform in this regime (Figure S15B, red curve). When  $\sigma$  is large, however, the error functions undergo a more gradual transition, and the resulting  $p(r)$  adopts an apparently Gaussian distribution with mean 1/2 and a standard deviation similar to that of the underlying  $p(r|s)$  (Figures S15A and B, black curves). In other words, it appears that  $p(r) \rightarrow p(r|s = K)$  as  $\sigma \rightarrow \infty$ . To consider this possibility in greater detail, we numerically calculated the Kullback-Leibler divergence between  $p(r|s = K)$  and  $p(r)$ , and found that this divergence rapidly approaches 0 as  $\sigma$  increases (Figure S15D). This indicates that the marginal distribution of the response is limiting to the conditional distribution of the response; since  $h(R) \rightarrow h(R|S)$  as  $\sigma \rightarrow \infty$ , we have  $C(S; R) \rightarrow 0$  (Figure S15C).

## 6 Analytical model: Uniform signal and response distributions (single cell)

The difficulty with calculating  $h(R)$  for single cells in the Gaussian signal-response model prevented us from making any further progress on the trade-off between single-cell and population-level information. To overcome this problem, we considered a related model that is based on uniformly-distributed noise. To simplify the integrals and the resulting expressions, the

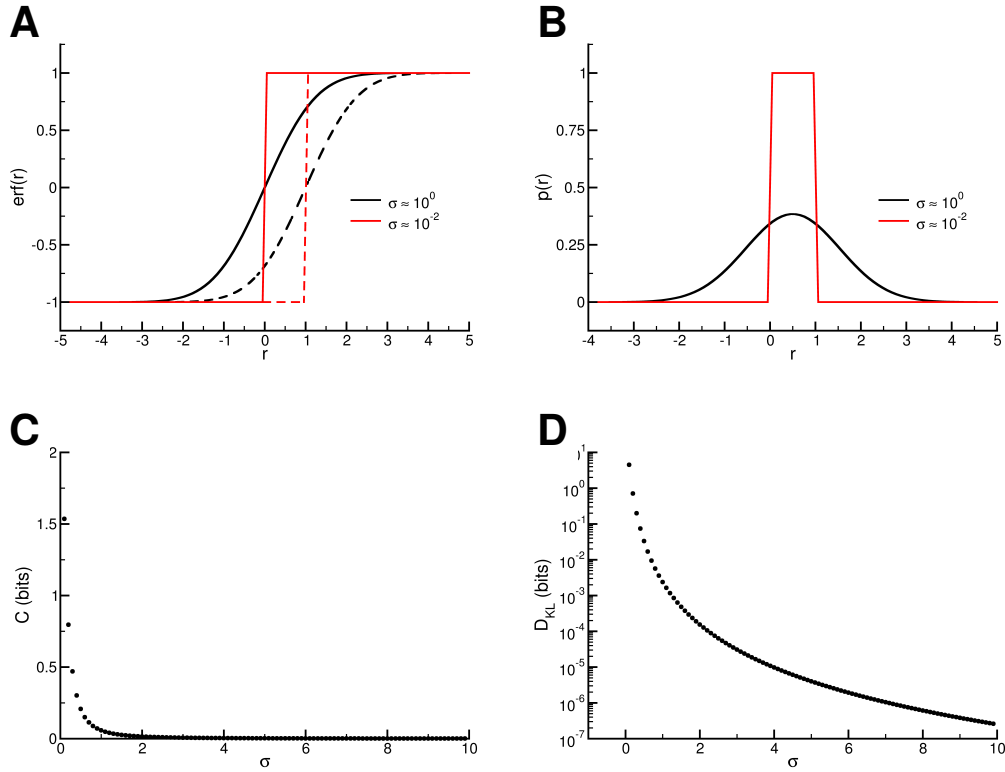

Figure S15: **A)** The marginal probability of  $r$  is the difference between two error functions. Here this difference is visualized with high (black) and low (red)  $\sigma$  values. **B)** The marginal probability of  $r$ ,  $p(r)$ . As  $\sigma$  approaches 0,  $p(r)$  becomes a uniform distribution between 0 and 1, with an entropy of 0 bits. As  $\sigma$  increases, the distribution seems to adopt a Gaussian character with mean  $1/2$ . **C)** Channel capacity resulting from numerical integration of the Gaussian model. The x-axis is the standard deviation,  $\sigma$ , of  $p(r|s)$ . **D)** The Kullback-Leibler divergence between  $p(r|s = K)$  and  $p(r)$ ,  $D_{\text{KL}}(p(r|s = K) || p(r))$ . As  $\sigma \rightarrow \infty$ ,  $D_{\text{KL}}(p(r|s = K) || p(r)) \rightarrow 0$  confirming that  $p(r)$  becomes a Gaussian distribution with a standard deviation equal to that of  $p(r|s = K)$ .

logarithms shown in the following equations are the natural logarithm, and as a result they report the mutual information in units of “nats.” Conversion to the more standard units of bits can be achieved simply by multiplying each expression by the factor  $\log_2 e$ . To ease comparison with previous figures, this conversion was performed for all of the plots in this section, as well as in Section 7.

## 6.1 Definitions

With this model, the notation generally remains the same, and the structural differences are outlined in the following definitions. Most notably, the signal-response relationship is linear, and the probability distribution of responses given a particular signal are uniform.

1. The definition of the model in this case is:

$$R = \frac{S}{b} + \epsilon; \quad \epsilon \sim U(-a, a)$$

where  $U$  denotes a uniform distribution. In this case, the mean response at some signal  $s$  is just  $s/b$ . Note that the parameter  $a$  in this model sets the level of “noise” in the conditional response  $p(r|s)$ , and so  $a$  plays a role similar to that of  $\sigma$  in our gaussian models.

2. To ensure that the mean response is restricted to the interval  $[0, 1]$ , we define the domain of  $S$  as  $[0, b]$ . As a result, we have that all responses lie on the interval  $[-a, 1 + a]$ .

While this model is much simpler than the Gaussian models analyzed above, it captures the majority of the salient features of those models: the average response is an increasing function of  $s$ , and there is some distribution of responses about that mean, the width of which is controlled by a “noise” parameter. As a consequence of these definitions, we have that:

$$p(r|s) = \frac{1}{2a}$$

which is just the uniform probability density on the interval  $[s/b - a, s/b + a]$ . As with the Gaussian models above, we also need to have some marginal distribution of signal  $p(s)$  to calculate relevant information-theoretic quantities. Using again the result of Laughlin, we have:

$$p(s) = \frac{d}{ds} \left( \frac{s}{b} \right) = \frac{1}{b}.$$

Note that we will also define the half-maximal response to be  $K$  for consistency in notation; in this case, we simply have  $K = b/2$ .

In analyzing this model, it is helpful to first define two distinct scenarios depending on the range of values that  $a$  can take:

1.  $a < \frac{1}{2}$
2.  $a \geq \frac{1}{2}$

As can be seen below, these two scenarios set the different bounds of integration one needs to use in order to calculate the marginal distribution of responses  $p(r)$ . The reason for this is the fact that, when  $a < 0.5$  we can always find two signal values  $s_1, s_2 \in [0, b]$ ,  $s_1 < s_2$  such that  $s_1/b + a < s_2/b + a$ . In other words, it is always possible to find some finite regions of signal space whose response distributions *do not* overlap. When  $a = 0.5$ , or course, we have that the two extreme values of  $s$  have probability distributions that *do* overlap, since  $0/b + 1/2 = b/b - 1/2$ . For  $a < 0.5$ , the size of this region of complete overlap increases with increasing  $a$ .

## 6.2 Calculating $C(S; R)$ when $a < 1/2$

We will first examine the cases in which not all signal-dependent distributions overlap.

### 6.2.1 Calculating $p(r)$

The first step in calculating the mutual information of this model is to find the marginal and conditional distributions of one of the variables and since we have the conditional distribution of  $R$  by definition, we will first focus on determining the marginal distribution of  $R$ .

For any given value of  $r$  there are a range of signal values from which it can arise. We define the lower and upper bounds of this range as follows:

- $S_m(r)$  is the minimum signal that can produce  $r$
- $S_M(r)$  is the maximum signal that can produce  $r$

Since  $a < 1/2$ , there are three distinct regions for  $r$  based on the fact that  $r$  values within these regions share the functional form of the limits  $S_m$  and  $S_M$ :

1.  $-a \leq r \leq a$
2.  $a < r < 1 - a$
3.  $1 - a \leq r \leq 1 + a$ .

These regions can be visualized in Figure S16. We can use these bounds to construct an analytical expression to the probability density  $p(r)$  in some region  $i$  of  $R$  values:

$$\begin{aligned} p_i(r) &= \int_{S_{m,i}(r)}^{S_{M,i}(r)} p(r|s) p(s) ds \\ &= \int_{S_{m,i}(r)}^{S_{M,i}(r)} \frac{1}{2ab} ds \end{aligned}$$

### 6.2.2 Region 1

This region is characterized by the fact that  $p(r|s=0) \neq 0 \forall r \in [-a, a]$ ; in other words, this is the only set of  $r$  values that will have any contribution from  $s=0$ , which is the minimum possible  $S$  value in this model. So we have that  $S_{m,1} = 0$  is the lower bound of the integral  $p_1(r)$ . The upper bound is the largest value of  $s$  that allows sampling of a particular  $r$  value, which in this case depends on  $r$  itself. To find this limit, we note that, if  $s/b - a > r$  then  $p(r|s) = 0$ , so naturally  $S_{M,1} = (r+a)b$ . To summarize, our bounds for this region are:

$$S_{m,1}(r) = 0$$

$$S_{M,1}(r) = (r+a)b.$$

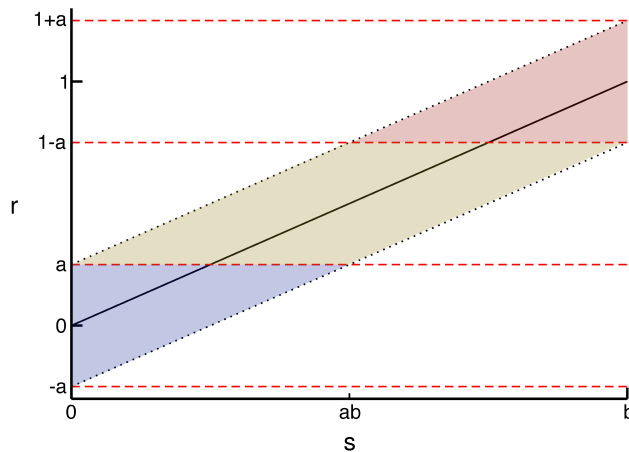

Figure S16: This plot shows a representation of a possible dose-response curve for the uniform model where  $a \leq 1/2$ ; in this case,  $a = 1/2$  for simplicity. The solid black line is the average response for some signal-dependent response distribution, and the dotted lines indicate the minimum and maximum responses for the distribution. Red dashed lines delimit distinct response regions; region 1 is blue, region 2 is yellow and region 3 is red. Note that the signal value  $ab$  corresponds to the maximum signal value for any response in region 1 and the the value  $b - ab$  is the minimum for any response in region 3.

We can then construct the final expression for the probability density for any given  $r$  in region 1:

$$\begin{aligned}
 p_1(r) &= \int_0^{(r+a)b} \frac{1}{2ab} ds = \frac{1}{2ab} (r+a)b \\
 &= \frac{r}{2a} + \frac{1}{2}.
 \end{aligned}$$

### 6.2.3 Region 2

This region's upper bound is the same as region 1, however the lower bound is the smallest value  $s$  that allows sampling of that particular  $r$  value. Using reasoning similar to that above, we have:

$$S_{m,2}(r) = (r - a)b$$

$$S_{M,2}(r) = (r + a)b.$$

The probability of  $R$  in region 2 is then:

$$\begin{aligned} p_2(r) &= \int_{(r-a)b}^{(r+a)b} \frac{1}{2ab} ds = \frac{1}{2ab} ((r+a) - (r-a)) b \\ &= \frac{r+a}{2a} - \frac{r-a}{2a} = \frac{2a}{2a} \\ &= 1. \end{aligned}$$

#### 6.2.4 Region 3

This region is analogous to region 1, since one bound is constant and the other is variable. However in this case the upper bound is fixed at  $b$  since all  $r$  values in this region have  $p(r|s=b) \neq 0$  and  $b$  is the largest possible value of  $s$ . The lower bound is identical to that in region 2, so we have:

$$S_m(r) = (r-a)b$$

$$S_M(r) = b.$$

The probability density for  $r$  in region 3 is then:

$$\begin{aligned} p_3(r) &= \int_{(r-a)b}^b \frac{1}{2ab} ds = \frac{1}{2ab} (b - (r-a)b) \\ &= \frac{1-r}{2a} + \frac{1}{2}. \end{aligned}$$

#### 6.2.5 Probability density of the response

The overall probability density  $p(r)$  is given by the following piecewise function:

$$p(r) = \begin{cases} \frac{r}{2a} + \frac{1}{2} & \text{if } -a \leq r \leq a \\ 1 & \text{if } a < r < 1-a \\ \frac{1-r}{2a} + \frac{1}{2} & \text{if } 1-a \leq r \leq 1+a \end{cases}$$

A plot of the probability density can be found in Figure [S17](#). We note that  $p(R)$  is continuous, since the probability densities agree with one another on the boundaries of the three regions, and of course  $\int p(r)dr = 1$ . Interestingly, as  $a \rightarrow 0$ ,  $p(R)$  becomes a uniform distribution on  $[0, 1]$ , and the resulting differential entropy,  $h(R)$ , limits to 0.

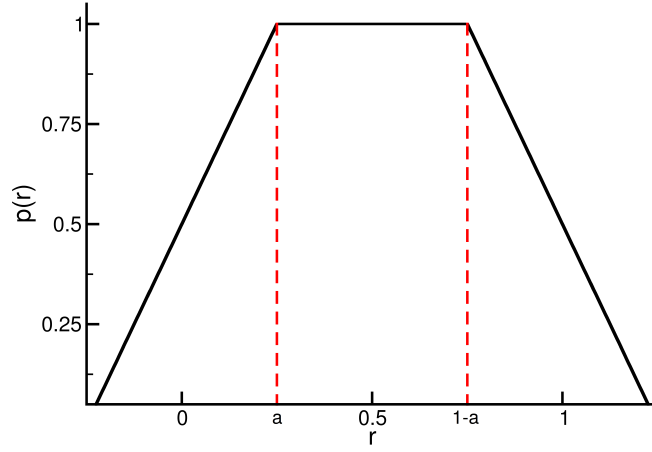

Figure S17:  $p(r)$  when  $a \leq 1/2$ . The red dotted lines delimit regions 1, 2, and 3 from left to right.

### 6.2.6 Calculating $h(R)$ and $C(S; R)$

With our expressions for  $p_i(R)$  we can construct an expression for  $h(R)$ :

$$\begin{aligned}
 h(R) &= - \int_{-a}^{1+a} p(r) \log p(r) dr \\
 &= - \left[ \int_{-a}^a p_1(r) \log p_1(r) dr + \int_a^{1-a} p_2(r) \log p_2(r) dr + \int_{1-a}^{1+a} p_3(r) \log p_3(r) dr \right] \\
 &= - \left[ \int_{-a}^a \frac{r+a}{2a} \log \frac{r+a}{2a} dr + \int_a^{1-a} 1 \log 1 dr + \int_{1-a}^{1+a} \frac{1-r+a}{2a} \log \frac{1-r+a}{2a} dr \right] \\
 &= - \left[ -\frac{a}{2} + 0 - \frac{a}{2} \right] \\
 &= a.
 \end{aligned}$$



We also must have the conditional differential entropy,  $h(R|S)$ , to find the mutual information. Since  $p(R|S)$  is a uniform distributions with a support range of  $2a$ , we know that:

$$\begin{aligned}
 h(R|S) &= - \int p(s) \cdot \int p(r|s) \log p(r|s) \, dr \, ds \\
 &= h(R|S = s) \cdot \int p(s) \, ds \\
 &= \log(2a) \cdot \int p(s) \, ds \\
 &= \log(2a) \cdot 1 \\
 &= \log(2a).
 \end{aligned}$$

We then have an analytical expression for  $C(S; R)$  when  $a \leq \frac{1}{2}$ :

$$I(S; R) = a - \log 2a.$$

### 6.3 Calculating $C(S; R)$ when $a \geq \frac{1}{2}$

We now calculate the expression for the channel capacity in the alternative scenario, when  $a \geq \frac{1}{2}$ .

#### 6.3.1 Calculating $p(r)$

When  $a \geq 1/2$ , there is a region in  $R$  in which every value in  $S$  contributes to the probability density in that region of  $R$ . Correspondingly, there is a change in the signal bounds of the three regions of  $R$  values:

1.  $-a \leq r \leq 1 - a$
2.  $1 - a < r < a$
3.  $a \leq r \leq 1 + a$ .

These regions can be visualized in Figure [S18](#).

#### 6.3.2 Regions 1 & 3

One can easily show that the bounds of integration ( $S_{m,i}(r)$  and  $S_{M,i}(r)$ ) are the same in this scenario as they were for the scenario where  $a < 0.5$ . This results in identical expressions for the

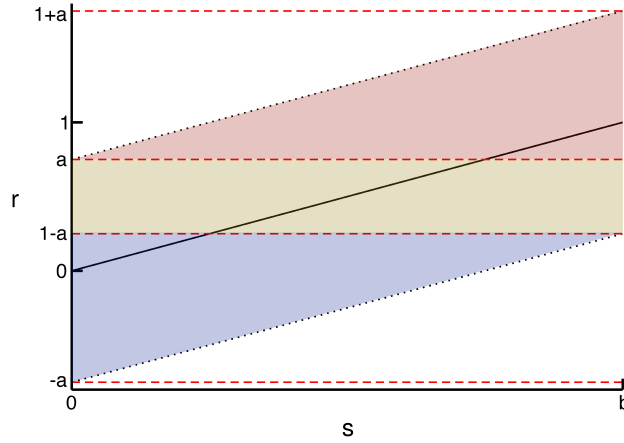

Figure S18: This plot shows a representation of a possible dose-response curve for the uniform model where  $a \geq 1/2$ . In this particular example,  $a = 3/4$ . The color scheme is as Figure S16. Note that the probability density in all of the response regions have contributions from all signal values, in contrast to the case where  $a < 1/2$ .

marginal probability densities:

$$p_1(r) = \frac{r}{2a} + \frac{1}{2}$$

$$p_3(r) = \frac{1-r}{2a} + \frac{1}{2}.$$

### 6.3.3 Region 2

This region is slightly different from that in 6.2.3 since all signals contribute equally to all response values (Figure S18). The bounds are thus the minimum and maximum signal values, 0 and  $b$ , respectively. The marginal probability is then:

$$p_2(r) = \int_0^b \frac{1}{2ab} ds$$

$$= \frac{1}{2a}.$$

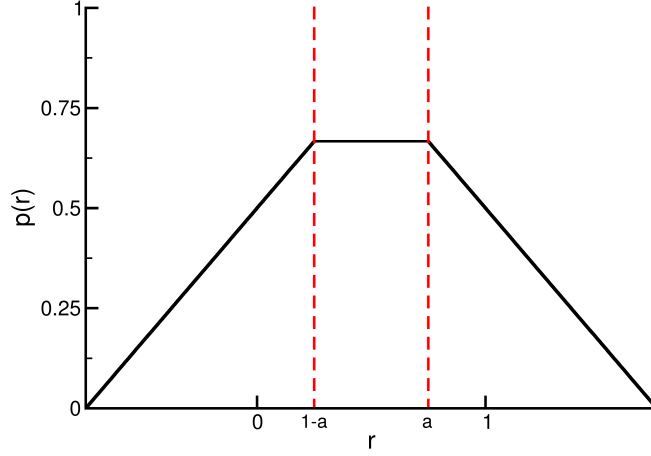

Figure S19:  $p(r)$  when  $a \geq 1/2$ . The red dotted lines delimit regions 1, 2, and 3 from left to right.

#### 6.3.4 Probability density of the response

As before we can assemble and plot the piecewise function for the probability density  $p(r)$  (Figure S19):

$$p(r) = \begin{cases} \frac{r}{2a} + \frac{1}{2} & \text{if } -a \leq r \leq 1-a \\ \frac{1}{2a} & \text{if } 1-a < r < a \\ \frac{1-r}{2a} + \frac{1}{2} & \text{if } a \leq r \leq 1+a \end{cases}$$

Note that  $p(r)$  is again continuous, and  $\int p(r)dr = 1$ .

#### 6.3.5 Calculating $h(R)$ and $C(S;R)$

As before we can now find the differential entropy of  $R$  and the channel capacity.

$$\begin{aligned} h(R) &= - \left[ \int_{-a}^{1-a} \frac{r+a}{2a} \log \frac{r+a}{2a} dr + \int_{1-a}^a \frac{1}{2a} \log \frac{1}{2a} dr + \int_a^{1+a} \frac{1-r+a}{2a} \log \frac{1-r+a}{2a} dr \right] \\ &= - \left[ -\frac{1}{8a} - \frac{\log(2a)}{4a} - \left( \frac{1}{2a} - 1 \right) \log(2a) - \frac{1}{8a} - \frac{\log(2a)}{4a} \right] \\ &= \frac{1}{4a} + \log(2a) \end{aligned}$$

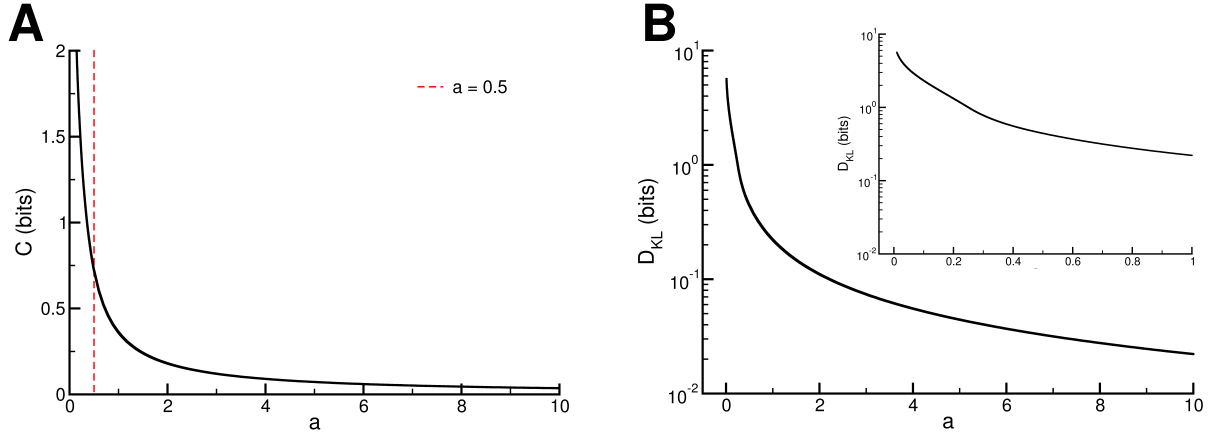

Figure S20: **A**) The channel capacity,  $C(S; R)$ , as a function of  $a$ . Note that the units of  $C$  have been converted to bits for the purposes of display. As expected, we observe that when  $a \rightarrow \infty$ ,  $C \rightarrow 0$ . **B**) The Kullback-Leibler divergence between  $p(r|s = K)$  and  $p(r)$ :  $D_{KL}(p(r|s = K) || p(r))$ . Inset is the same plot but with a scale of 0 to 1 instead of 0 to 10.

Note that  $h(R) \rightarrow \infty$  as  $a \rightarrow \infty$ , which is to be expected since the support of  $R$  becomes infinite in this case. Since the conditional differential entropy of  $R$  given  $S$  is identical to the model when  $a < \frac{1}{2}$ , we have mutual information for the model when  $a \geq \frac{1}{2}$ :

$$\begin{aligned}
 I(S; R) &= h(R) - h(R|S) \\
 &= \frac{1}{4a} + \log(2a) - \log(2a) \\
 &= \frac{1}{4a}
 \end{aligned}$$

#### 6.4 Analysis of $C(S; R)$

From the above calculations we can construct a piecewise function which defines the channel capacity for this model (Figure S20A).

$$C(S; R) = \begin{cases} a - \log(2a) & \text{if } a < 0.5 \\ \frac{1}{4a} & \text{if } a \geq 0.5 \end{cases}$$

Note that when  $a = \frac{1}{2}$ ,  $a - \log(2a) = \frac{1}{4a}$ , so  $C(S; R)$  is continuous. Furthermore, the first and second derivatives of each portion of the piecewise function are equivalent when evaluated at  $a = \frac{1}{2}$ : the values are  $-1$  and  $4$ , respectively. The two components of the piecewise function do not, however, necessarily coincide for higher-order derivatives. Ultimately, however, we find that

the single-cell channel capacity decays as  $1/a$  as  $a$  (or noise) increases above  $1/2$  in this model.

As with the Gaussian version of the model, we can understand the above results by examining the Kullback-Leibler divergence between the conditional probability density of the response at half-maximal signal value (*i.e.*  $p(r|s = K)$ ) and the marginal density  $p(r)$ . In this case, the simplicity of the model allows us to do this analytically:

$$\begin{aligned} D_{\text{KL}}(p(r|s = K) || p(r)) &= \int p(r|s) \log \frac{p(r|s)}{p(r)} dr \\ &= \int p(r|s) \log p(r|s) dr - \int p(r|s) \log p(r) dr \end{aligned}$$

where we have omitted the “ $s = K$ ” terms from the conditional densities on the right-hand side of the equation for notational brevity. From here forward, we will use the term  $D_{\text{KL}}$  to denote this expression. Of course the first term is  $-h(R|S = K) = -\log(2a)$ , however the second term is slightly more complex. We know that  $p(r|s = K)$  is only nonzero on the interval  $[\frac{1}{2} - a, \frac{1}{2} + a]$ , since  $K = b/2$ . This provides the bounds for the second integral above. These bounds, and the marginal probability density of  $r$ , depend on the value of  $a$ , and so to evaluate this integral, we again must split the model based on ranges of values of  $a$ . In this case there are three distinct intervals to consider:

1.  $a \leq \frac{1}{4}$
2.  $\frac{1}{4} < a \leq \frac{1}{2}$
3.  $a > \frac{1}{2}$

In the first case,  $p(r) = 1$  and so the resulting expression for the Kullback-Leibler divergence becomes:

$$\begin{aligned} D_{\text{KL}} &= -\log(2a) - \frac{1}{2a} \cdot \int_{\frac{1}{2}-a}^{\frac{1}{2}+a} \log 1 dr \\ &= -\log(2a) - \frac{1}{2a} \cdot 0 \\ &= -\log(2a) \end{aligned}$$

In the second case the integral must include terms to consider all regions of  $R$  space when

$$\frac{1}{4} < a \leq \frac{1}{2}:$$

$$\begin{aligned} D_{\text{KL}} &= -\log(2a) - \frac{1}{2a} \cdot \left[ \int_{\frac{1}{2}-a}^a \log\left(\frac{r}{2a} + \frac{1}{2}\right) dr + \int_a^{1-a} \log(1) dr + \int_{1-a}^{\frac{1}{2}+a} \log\left(\frac{1-r}{2a} + \frac{1}{2}\right) dr \right] \\ &= -\log(2a) - \frac{1}{2a} \left[ 1 + 2 \log 2 - \log \frac{1}{a} - 4a \right] \end{aligned}$$

Finally, the third case includes all three regions of  $R$  when  $a \geq \frac{1}{2}$ :

$$\begin{aligned} D_{\text{KL}} &= -\log(2a) - \frac{1}{2a} \cdot \left[ \int_{\frac{1}{2}-a}^{1-a} \log\left(\frac{r}{2a} + \frac{1}{2}\right) dr + \int_{1-a}^a \log\left(\frac{1}{2a}\right) dr + \int_a^{\frac{1}{2}+a} \log\left(\frac{1-r}{2a} + \frac{1}{2}\right) dr \right] \\ &= -\log(2a) - \frac{1}{2a} \cdot \left[ -1 + \log\left(\frac{1}{a}\right) + (2a-1) \log\left(\frac{1}{2a}\right) \right] \end{aligned}$$

Thus the Kullback-Leibler divergence over all values of  $a$  is:

$$D_{\text{KL}} = \begin{cases} -\log(2a) & \text{if } a \leq \frac{1}{4} \\ -\log(2a) - \frac{1}{2a} \cdot \left[ 1 + 2 \log 2 - \log \frac{1}{a} - 4a \right] & \text{if } \frac{1}{4} < a \leq \frac{1}{2} \\ -\log(2a) - \frac{1}{2a} \cdot \left[ -1 + \log\left(\frac{1}{a}\right) + (2a-1) \log\left(\frac{1}{2a}\right) \right] & \text{if } a > \frac{1}{2} \end{cases}$$

and it can be visualized in Figure S20B. As with the Gaussian model, as  $a \rightarrow \infty$ ,  $D_{\text{KL}} \rightarrow 0$ , implying that  $p(r)$  becomes equivalent to  $p(r|s = K)$  for large  $a$ . We can see this intuitively in Figure S19: note that regions 1 and 3 have a constant “width” of 1, while the size of region 2 is  $2a - 1$ . As  $a \rightarrow \infty$ , region 2 grows without bound, whereas regions 1 and 3 do not and thus contribute less and less to the overall support for the density  $p(r)$ . In this limit,  $p(r) \rightarrow \frac{1}{2a}$  on the interval  $[1/2 - a, 1/2 + a]$ , which is precisely  $p(r|s = K)$ .

## 7 Analytical model: Uniform signal and response distributions (cellular populations)

In this section, we use the simpler, uniform signal-response model to better understand how noise impacts information transfer to populations in the presence of a threshold.

### 7.1 Definitions

The following definitions are required for analysis of population-level information transmission:

- $\theta$  is the decision-making threshold; cells with  $r \geq \theta$  die and those with  $r < \theta$  survive.
- $N$  is total the number of cells in a population
- $p_d(s)$  is the probability of some cell in the population dying given a particular signal value
- $N_D$  is the total number of dead cells (*i.e.* the population response)

Other variables, such width of the uniform probability distribution ( $a$ ) are identical to the single-cell model (Section 6). For the following analysis we assume that  $\theta = \frac{1}{2}$  to simplify the analysis. As in our single-cell analysis, there are two cases that produce distinct behaviors:

1.  $0 < a \leq \frac{1}{2}$
2.  $a > \frac{1}{2}$

## 7.2 Characterizing signal space

### 7.2.1 Case 1

Since  $a \leq \frac{1}{2}$ , there is always a region in signal space near  $s = 0$  in which all cells fall below the threshold (they all survive) that can be seen in Figure S21. The upper bound of this region is termed  $S_{\min}$ . Similarly, there is a region near  $s = b$  where all cells are above the threshold (they all die), whose lower bound is  $S_{\max}$ . These values can also be defined in such a way that  $S_{\min}$  is the largest value of  $s$  for which no cells die, and  $S_{\max}$  is the smallest value of  $s$  for which all cells die. These two bounds delimit the region of signal space that we term the *transition zone*, and can be determined algebraically. We previously characterized the single-cell response,  $r$ , given some value  $s \in S$  as a uniform distribution that lies on the interval:

$$r(s) \in \left[ \frac{s}{b} - a, \frac{s}{b} + a \right]$$

Thus  $S_{\min}$  corresponds to the signal producing the response distribution whose maximum is equal to the decision threshold:

$$\frac{1}{2} = \frac{S_{\min}}{b} + a$$

We can find  $S_{\max}$  similarly, resulting in a transition zone corresponding to the interval:

$$[S_{\min}, S_{\max}] = \left[ b \left( \frac{1}{2} - a \right), b \left( \frac{1}{2} + a \right) \right]$$

which can be visualized in Figure S21. This region of signal space is of interest since it is the only region that positively contributes to the population mutual information by having a nonzero correlation between  $S$  and the number of dead cells in a population (the population response,  $N_D$ ) as seen in Figure S22A. We will restrict our analysis of the population information transmission in case 1 to this particular region of signal space.

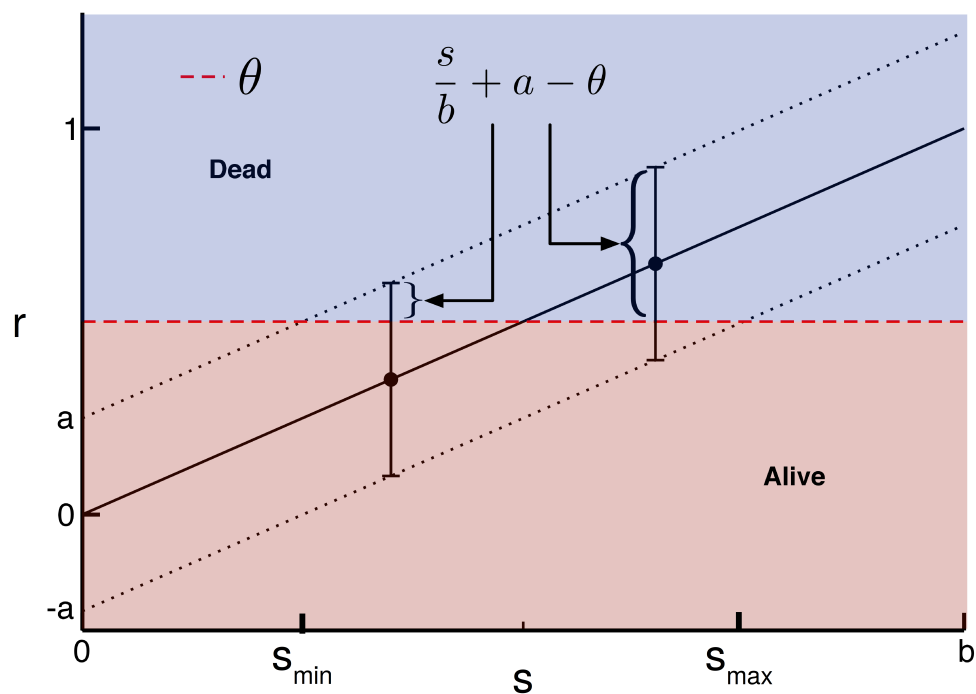

Figure S21: A visual representation of population response to signal in terms of fractional survival of cells, where  $\theta$  is the threshold above which cells die; the other variables are defined in the text. We can find the fraction of cells that die given a particular signal value with a simple algebraic expression  $s/b + a - \theta$  and then normalize it to define the probability of death for a cell exposed to a signal value, defined in the text as:  $p_d(s)$ .



### 7.2.2 Case 2

Since  $a > \frac{1}{2}$ , all signal values produce response distributions that generate fractional population survival. Therefore the bounds  $S_{\min}$  and  $S_{\max}$  do not exist, since they would be less than 0 and greater than  $b$ , respectively. In other words, the entirety of signal space considered falls within the transition zone.

## 7.3 Population response to signal

Given the definitions and limits defined above, we can construct both the conditional response of the population (i.e.  $p(N_D|s)$ ) and, from that distribution, calculate the average response as a function of signal. Given the conditional response of individual cells to signal (i.e.  $p(r|s)$ ), we can calculate the probability that a cell in the population dies, based on the proportion of the response distribution that lies above the decision-making threshold,  $\theta = \frac{1}{2}$ , as seen in Figure S21:

$$p_d(s) = \int_{\theta}^{\frac{s}{b}+a} p(r|s)dr = \frac{\frac{s}{b} + a - \frac{1}{2}}{2a}$$

where we have implicitly assumed that  $S_{\min} \leq s \leq S_{\max}$  for the cases defined above, depending on the value of  $a$ . In our model, all cells respond independently, so it follows that the number of cells that die given a particular population size and signal value is binomially distributed:

$$p(N_D|s) = \binom{N}{N_D} p_d(s)^{N_D} (1 - p_d(s))^{N - N_D}$$

As a result, the mean number of dead cells at any signal value  $s$  is:

$$\overline{N_D}(s) = p_d(s) \cdot N$$

which defines the (average) signal-response behavior of the population.

### 7.3.1 Average population response for Case 1

As discussed above, we have either complete survival and or complete death in populations exposed to signals below  $S_{\min}$  and above  $S_{\max}$ , respectively (see Figure S22A). Given this fact, we obtain the following piecewise function for  $\overline{N_D}(s)$ :

$$\overline{N_D}(s) = \begin{cases} 0 & \text{if } s < S_{\min} \\ \frac{\frac{s}{b} + a - \frac{1}{2}}{2a} \cdot N & \text{if } S_{\min} \leq s \leq S_{\max} \\ N & \text{if } s > S_{\max} \end{cases}$$

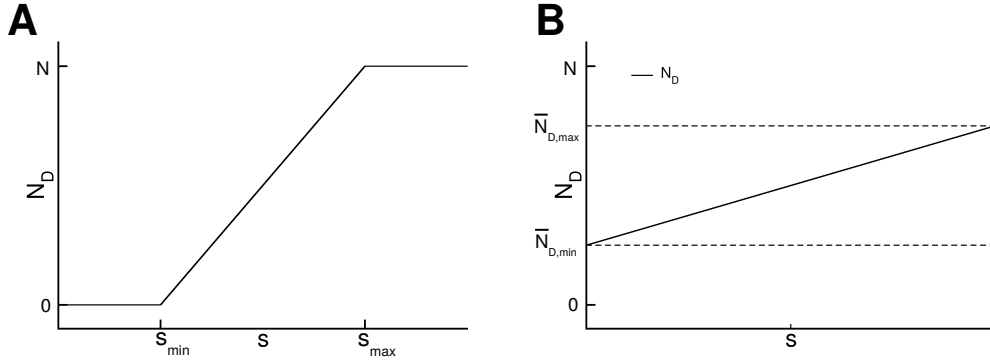

Figure S22: A plot of mean population response to signal for case 1 (**A**) and case 2 (**B**)

### 7.3.2 Case 2

The bounds of signal space in this case correspond to instances in which the population response is fractional (Figure S22B). We can define the minimum and maximum average population response as follows:

$$\begin{aligned}\overline{N}_{D,\min} &= N \left( \frac{a - \frac{1}{2}}{2a} \right) \\ \overline{N}_{D,\max} &= N \left( \frac{1 + a - \frac{1}{2}}{2a} \right) = N \left( \frac{a + \frac{1}{2}}{2a} \right)\end{aligned}$$

In this case, the average population response follows:

$$\overline{N}_D(s) = \frac{\frac{s}{b} + a - \frac{1}{2}}{2a} \cdot N = \overline{N}_{D,\min} + \frac{N}{2ab}s$$

## 7.4 Finding the optimal signal distributions

As before, to calculate the maximum of  $I$  (*i.e.* the channel capacity), we define the probability density of  $S$  based on the first derivative of the average signal-response function. To do this, however, we must focus on a dose-response relationship that is defined on the interval  $(0, 1)$ , so we focus on the *fractional* response of the population. The form of this fractional response depends on the value of  $a$  as described below.

### 7.4.1 Case 1

Taking this derivative is relatively simple for case 1, since the minimum and maximum fractional responses are 0 and 1, respectively, and so we can define the fractional response as just  $\frac{\overline{N}_D}{N}$  in this

case. Thus, for  $s \in [S_{min}, S_{max}]$ , we have:

$$p(s) \equiv \frac{d\overline{N_D}}{ds} = \frac{1}{2ab}$$

Note that this is just the uniform probability density on  $[S_{min}, S_{max}]$ . Outside the transition zone,  $\overline{N_D}$  does not depend on  $s$ , so  $p(s) = 0$ .

#### 7.4.2 Case 2

As mentioned above, interpreting the average dose-response function as the CDF of the probability density of signal requires that this average cover the interval  $(0, 1)$ . Finding  $p(s)$  thus requires care when  $a > 1/2$  since the minimum and maximum population responses are not 0 and 1, and depend on  $a$ . To overcome this issue, we defined a normalized response function ( $R'(s)$ ) that has minimum and maximum values of 0 and 1, respectively:

$$R'(s) \equiv \frac{\overline{N_D}(s) - \overline{N_{D,\min}}}{\overline{N_{D,\max}} - \overline{N_{D,\min}}}$$

which simplifies to

$$R'(s) = \frac{s}{b}$$

The resulting signal density is then just:

$$p(s) \equiv \frac{dR'}{ds} = \frac{1}{b}$$

which again is just the uniform density on the relevant domain of  $S$  (*i.e.*  $[0, b]$ ).

### 7.5 Calculating population-level channel capacities

With the above signal distributions, we can calculate the channel capacity between the signal and response (as the number of dead cells) by determining the marginal and conditional entropies:

$$C(S; N_D) = H(N_D) - H(N_D|S)$$

### 7.5.1 Case 1

Finding  $H(N_D|S)$  is relatively straightforward, since the approximate entropy of a binomial distribution is known:

$$\begin{aligned} H(N_D|S) &= \int_{S_{\min}}^{S_{\max}} p(s) \cdot \left( \sum_{N_D=0}^N -p(N_D|S) \log p(N_D|S) \right) ds \\ &\approx \int_{S_{\min}}^{S_{\max}} \frac{1}{2ab} \cdot \frac{1}{2} \log(2\pi e \cdot N \cdot p_d(s)(1-p(s))) ds \\ &= \frac{1}{2} \log(2\pi N) - \frac{1}{2} \end{aligned}$$

We then need the marginal probability of the number of dead cells to calculate  $H(N_D)$ :

$$\begin{aligned} p(N_D) &= \int_{S_{\min}}^{S_{\max}} p(s) \cdot p(N_D|s) ds \\ &= \int_{S_{\min}}^{S_{\max}} \frac{1}{2ab} \cdot \binom{N}{N_D} p_d(s)^{N_D} (1-p_d(s))^{N-N_D} ds \\ &= \frac{1}{1+N} \end{aligned}$$

Interestingly, for case 1, we thus have that the marginal probability  $p(N_D)$  is just the uniform probability mass function for the set  $\{0, 1, \dots, N\}$ ; in other words, the total probability of finding  $N_D$  dead cells across all of the relevant signal space is just the uniform probability over all the possible states (ranging from 0 cells dying to all of them dying). It is then straightforward to calculate the entropy:

$$H(N_D) = \sum_{N_D=0}^N -\frac{1}{1+N} \log \frac{1}{1+N} = \log(1+N)$$

Thus when  $0 < a \leq \frac{1}{2}$  we find that

$$C(S; N_D) = \log(1+N) - \left( \frac{1}{2} \log(2\pi N) - \frac{1}{2} \right) \quad (4)$$

We first note that this expression is invariant on  $a$  for  $a \leq \frac{1}{2}$ . This echoes our findings in Section 4.5: since we have taken  $S$  to be continuous, then by definition the “minimal signal resolution”  $\Delta s = 0$ . As a consequence, the population-level channel capacity does not depend on the level of noise below the  $a = \frac{1}{2}$  threshold. Also, note that, as  $N$  becomes large, we can re-write this

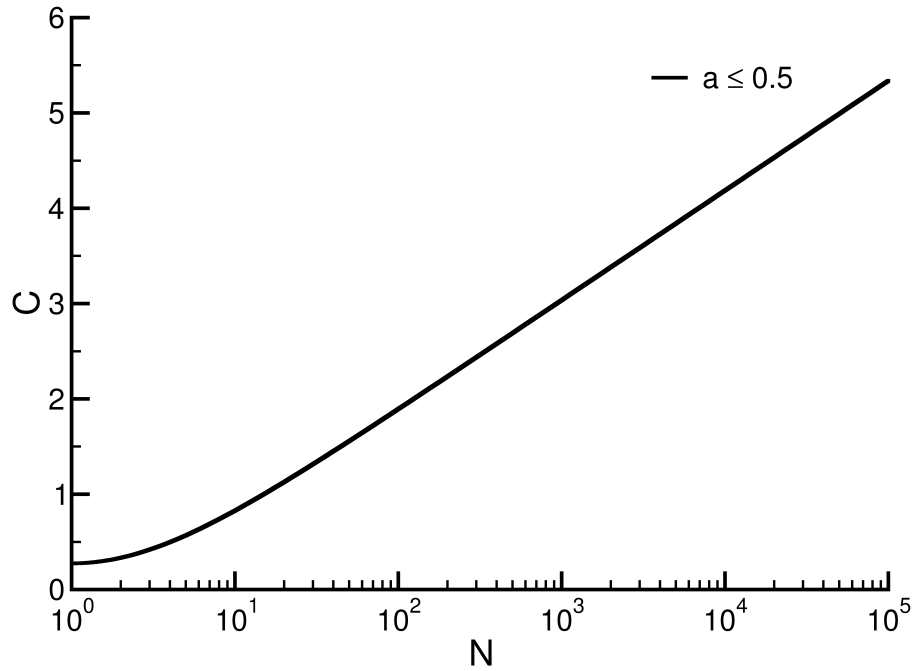

Figure S23:  $C(S; N_D)$  increases monotonically with the size of the population,  $N$ , when  $a \leq 1/2$  (Equation 4). For large values of  $N$  this increase follows  $C(S; N_D) \sim \log \sqrt{N}$  (Equation 5).

expression as:

$$C(S; N_D) \sim \frac{1}{2} \log N \quad (5)$$

or, in other words, the channel capacity is just  $\log \sqrt{N}$ . This is perhaps not surprising, given the underlying binomial structure of  $p(N_D|s)$ , but nonetheless indicates that the maximum of the population-level information transfer scales monotonically with  $N$  (Figure S23 and Figure 3D in the main text).

### 7.5.2 Case 2

The expression for conditional entropy is slightly more complicated when  $a > \frac{1}{2}$ :

$$\begin{aligned} H(N_D|S) &= \int_0^b \frac{1}{b} \cdot \left( \frac{1}{2} \log(2\pi e \cdot N \cdot p_d(s)(1-p_d(s))) \right) ds \\ &= \frac{1}{2} \log(2a+1) - \frac{1}{2} + a \log(2a+1) + \frac{1}{2} \log(2a-1) - a \log(2a-1) \\ &\quad - \frac{3}{2} \log(2) + \frac{1}{2} \log(\pi) - \log(a) + \frac{1}{2} \log(N) \end{aligned}$$

Again, finding the marginal entropy requires an expression for  $p(N_D)$ :

$$\begin{aligned} p(N_D) &= \int_0^b \frac{1}{b} \cdot \binom{N}{N_D} p_d(s)^{N_D} (1-p_d(s))^{N-N_D} ds \\ &= 2a \cdot \binom{N}{N_D} \cdot (B_u(N_D+1, N-N_D+1) - B_v(N_D+1, N-N_D+1)) \end{aligned}$$

where  $B_x(a, b)$  denotes the incomplete beta function and

$$\begin{aligned} u &= \frac{a + \frac{1}{2}}{2a} \\ v &= \frac{a - \frac{1}{2}}{2a} \end{aligned}$$

Interestingly, this expression mimics the one we obtained for single-cell responses in the Gaussian model (Section 5). Calculating  $H(N_D)$  requires computing the following finite sum:

$$H(N_D) = - \sum_{N_D=0}^N p(N_D) \log p(N_D) \quad (6)$$

Computing this sum in closed form is made difficult by the fact that the difference of incomplete beta functions enters the expression under the log, and in the end we did not discover a solution. We therefore numerically calculated the marginal entropy,  $H(N_D)$  for values of  $a \in [\frac{1}{2}, 2]$ , and plotted our results for the mutual information together with those from case 1 for multiple population sizes (Figure S24). We see that, for  $a > \frac{1}{2}$ , the population-level information decreases significantly as  $a$  increases (see Figure S24). Intuitively, this occurs because the transition in  $N_D$  no longer covers the entire set of possibilities from 0 to  $N$  (Figure S22B).

## 8 Experimental Methods

HeLa cells were maintained in DMEM medium (Corning 10-013-CV) with 10% fetal bovine serum and 1% penicillin/streptomycin solution (Life Technologies 15140-122). For TRAIL dose-response assays, HeLa cells were plated at a density of 250k cells/well in 12-well plates (Sigma SIAL0513), allowed to adhere overnight, and treated with varying doses of SuperKiller TRAIL (Axxora

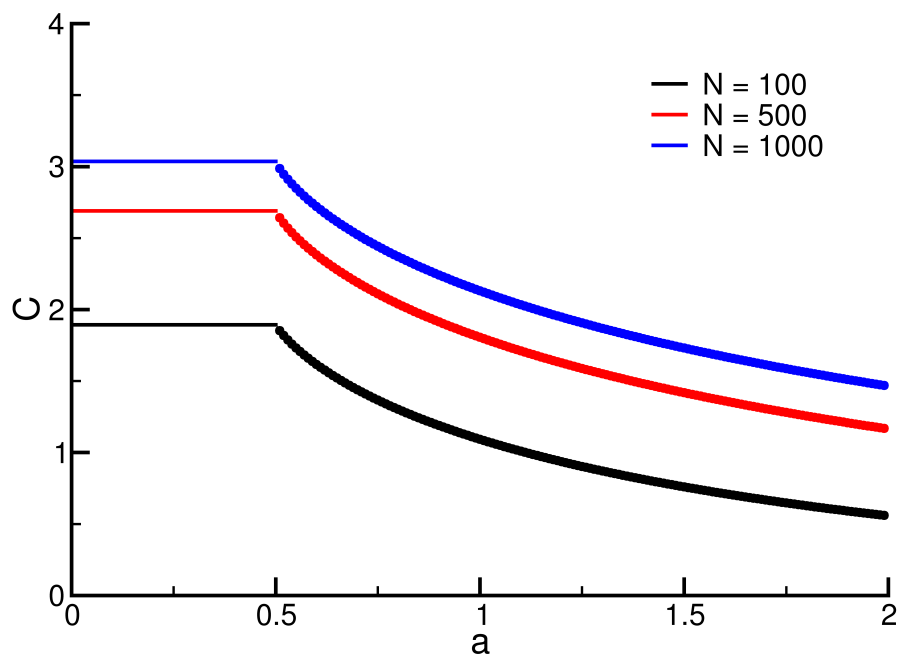

Figure S24:  $C(S; N_D)$  as a function of  $a$  when  $\theta = 1/2$ . For  $a < 1/2$  we used the closed-form solution from our model (Equation 4). For  $a \geq 1/2$  we numerically calculated  $C$  by directly evaluating the sum in Equation 6. Note that  $C$  is invariant on  $a$  for  $a < 1/2$ , but then decreases monotonically as  $a$  increases above that threshold.

ALX-201-115) for 11 hours. Three replicate wells were used for each TRAIL dose to establish the technical variability of the assay. After treatment, medium containing dead cells was transferred to flow cytometry tubes (BD Falcon 352235) containing 2 ml FACS buffer (PBS + 10% fetal bovine serum); cells remaining in the wells were removed by trypsinization, added to the corresponding tubes, pelleted by centrifugation and fixed in 4% paraformaldehyde for 30 minutes. After fixation cells were washed twice in PBS and permeabilized in 100% methanol overnight at -20C. Cells were stained with primary antibodies to cleaved caspase 3 (rabbit anti-cleaved caspase 3, BD 559565) and cleaved PARP (mouse anti-cleaved PARP, BD 552596) 1:250 in FACS buffer (PBS + 0.1% Tween-20) for 1 hour at 25C. Cells were washed twice in PBS-T, then treated with secondary antibodies: Alexa-488 donkey anti-rabbit IgG (Life Technologies A-21206) and Alexa-594 donkey anti-mouse IgG (Life Technologies A21203), 1:500 in FACS buffer for 1 hr at 25C. Cells were washed in PBS-T, resuspended in PBS, and counted on a flow cytometer (BD LSRII), with 20,000 cells analyzed per experimental replicate.

MCF10A cells were obtained from J. Brugge (Harvard Medical School, Boston, MA) and cultured as described (22). For TRAIL dose response assays, MCF10A cells were plated in 96-well plates (Corning 353072) and treated with varying doses of SuperKiller TRAIL for 11 hours. After treatment the cells were washed with PBS and the density of viable cells was assayed by methylene blue staining as described previously (23).



## References

1. Shannon CE (1948) A Mathematical Theory of Communication. *Bell System Technical Journal* 27:379–423.
2. Paninski L (2003) Estimation of Entropy and Mutual Information. *Neural Computation* 15(6):1191–1253.
3. Cheong R, Rhee A, Wang CJ, Nemenman I, Levchenko A (2011) Information transduction capacity of noisy biochemical signaling networks. *Science (New York, NY)* 334(6054):354–358.
4. Strong S, Koberle R, de Ruyter van Steveninck R, Bialek W (1998) Entropy and Information in Neural Spike Trains. *Physical Review Letters* 80(1):197–200.
5. Steuer R, Kurths J, Daub CO, Weise J, Selbig J (2002) The mutual information: detecting and evaluating dependencies between variables. *Bioinformatics (Oxford, England)* 18 Suppl 2:S231–40.
6. Albeck JG, Burke JM, Spencer SL, Lauffenburger DA, Sorger PK (2008) Modeling a Snap-Action, Variable-Delay Switch Controlling Extrinsic Cell Death. *PLoS Biology* 6(12):e299.
7. Albeck JG et al. (2008) Quantitative Analysis of Pathways Controlling Extrinsic Apoptosis in Single Cells. *Molecular cell* 30(1):11–25.
8. (2010) *R: A Language and Environment for Statistical Computing*. (The R Foundation for Statistical Computing, Vienna, Austria).
9. Bashor CJ, Helman NC, Yan S, Lim WA (2008) Using Engineered Scaffold Interactions to Reshape MAP Kinase Pathway Signaling Dynamics. *Science (New York, NY)* 319(5869):1539–1543.
10. Sacan A, Ferhatosmanoglu H, Coskun H (2008) CellTrack: an open-source software for cell tracking and motility analysis. *Bioinformatics (Oxford, England)* 24(14):1647–1649.
11. Burov S et al. (2013) Distribution of directional change as a signature of complex dynamics. *PNAS* 110(49):19689–19694.
12. van der Wath RC, Gardiner BS, Burgess AW, Smith DW (2013) Cell organisation in the colonic crypt: A theoretical comparison of the pedigree and niche concepts. *PLoS ONE* 8(9):1–15.
13. Lencer W et al. (1997) Induction of epithelial chloride secretion by channel-forming cryptdins 2 and 3. *PNAS* 96(16):8585–9.
14. Paulsson J (2004) Summing up the noise in gene networks. *Nature* 427:415–8.
15. Hilfinger A, Paulsson J (2011) Separating intrinsic from extrinsic fluctuations in dynamic biological systems. *PNAS* 108(29):12167–72.

16. Elowitz MB (2002) Stochastic Gene Expression in a Single Cell. *Science (New York, NY)* 297(5584):1183–1186.
17. Swain PS, Elowitz MB, Siggia ED (2002) Intrinsic and extrinsic contributions to stochasticity in gene expression. *PNAS* 99:12795–12800.
18. Huber MF, Bailey T, Durrant-Whyte H, Hanebeck UD (2008) On entropy approximation for gaussian mixture random vectors in *Proc IEEE Int Conf Multisensor Fusion Integr Intell Syst.* pp. 181–188.
19. Laughlin S (1981) A simple coding procedure enhances a neuron’s information capacity. *Zeitschrift fur Naturforschung - Section C Journal of Biosciences* 36(9-10):910–912.
20. Wolfram Research, Inc. (2016) Mathematica.
21. Oliphant TE (2007) Python for scientific computing. *Computing in Science & Engineering* 9:10–20.
22. Debnath J, Muthuswamy SK, Brugge JS (2003) Morphogenesis and oncogenesis of MCF-10A mammary epithelial acini grown in three-dimensional basement membrane cultures. *Methods* 30(3):256–268.
23. Flusberg DA, Roux J, Spencer SL, Sorger PK (2013) Cells surviving fractional killing by TRAIL exhibit transient but sustainable resistance and inflammatory phenotypes. *Molecular Biology of the Cell* 24(14):2186–2200.
